# Supplementary material for: Room temperature charge-transfer phosphorescence from organic donor–acceptor Co-crystals
Source: Chem Sci. 2022 Aug 10;13(34):10011–9. doi: 10.1039/d2sc03343g (PMC9430718; doi:10.1039/d2sc03343g)
Supplement: SC-013-D2SC03343G-s001 [file SC-013-D2SC03343G-s001.pdf]

## Supporting Information

### Room Temperature Charge-Transfer Phosphorescence from Organic Donor-Acceptor Co-crystals

Swadhin Garain,<sup>a</sup> Shagufi Naz Ansari,<sup>a</sup> Anju Ajayan Kongasseri,<sup>a</sup> Bidhan Chandra Garain,<sup>b</sup> Swapan K. Pati,<sup>b</sup>  
and Subi J. George<sup>\*a</sup>

<sup>a</sup>New Chemistry Unit and School of Advanced Materials, Jawaharlal Nehru Centre for Advanced Scientific Research (JNCASR) Jakkur, Bangalore 560064, India

<sup>b</sup>Theoretical Sciences Unit, Jawaharlal Nehru Centre for Advanced Scientific Research (JNCASR), Jakkur, Bangalore 560064, India.

## Table of Contents

1. General Methods
2. Synthetic Schemes and Procedures
3. Experimental Procedures
4. Supporting Figures
5. Supporting Characterization Original Data
6. References
1. General Methods

**NMR Measurements:**  $^1\text{H}$  and  $^{13}\text{C}$  NMR spectra were recorded on a BRUKER AVANCE-400 fourier transformation spectrometer with 400 and 100 MHz respectively. The spectra were calibrated with respect to the residual solvent peaks. The chemical shifts are reported in parts per million (ppm) with respect to TMS. Short notations used are, s for singlet, d for doublet, t for triplet.

**Spectroscopic Measurements:** Electronic absorption spectra were recorded on Jasco V-750 UV-Visible spectrophotometer and emission spectra were recorded on FLS1000 spectrometer, Edinburgh Instruments. Solution state UV-Vis and emission spectra were recorded in 10 mm path length cuvette. Fluorescence spectra of the films were recorded in front-face geometry to avoid self-absorption.

**Lifetime and quantum yield measurements:** Fluorescence lifetimes were performed on a Horiba Delta Flex time-correlated single-photon-counting (TCSPC) instrument. A 340 nm diode and 373 nm, 442 nm laser diode with a pulse repetition rate of 1 MHz was used as the light source. The instrument response function (IRF) was collected by using a scatterer (Ludox AS40 colloidal silica, Sigma-Aldrich). Phosphorescence lifetime ( $\lambda_{\text{exc.}} = 340 \text{ nm}$  and  $430 \text{ nm}$ ), gated emission and time-resolved excitation and emission were measured on FLS1000 spectrometer, Edinburgh Instruments equipped with a micro flash-lamp ( $\mu\text{F2}$ ) set-up. Quantum yields were measured using an integrating sphere in the same instrument.

**High Resolution Mass Spectrometry (HR-MS):** HR-MS was carried out using Agilent Technologies 6538 UHD Accurate-Mass Q-TOFLC/MS.

**Single Crystal X-ray Crystallography:** Suitable single crystal of the **A+D<sub>2</sub>** and **A+D<sub>4</sub>** compound was mounted on a thin glass fibre with commercially available super glue. Intensity data were collected Bruker D8 VENTURE diffractometer equipped with a PHOTON detector and graphite-monochromated Mo-K $\alpha$  radiation ( $\lambda = 0.71073 \text{ \AA}$ , 50 kV, 1mA) at 100 K. APEX III software was used to collect, reduce and integrate the raw data. The direct method was used for solving crystal structure, followed by full-matrix least-squares refinements against F<sup>2</sup> (all data HKLF 4 format) using the SHELXL 2014/7 and difference Fourier synthesis and least-squares refinement revealed the positions of the non-hydrogen

atoms. All nonhydrogen atoms were refined anisotropically and remaining hydrogen atoms were placed in geometrically constrained positions and refined with isotropic temperature factors, generally  $1.2 \times U_{eq}$  of their parent atoms. Molecular structure drawings were prepared using the program Mercury (ver 3.1). We have selected the best crystal; however, few alerts are generated and can't be resolved despite several attempts due to the weak diffraction of crystals.

**Computational Details:** Ground State ( $S_0$ ) of donor-acceptor pairs (**A+D<sub>5</sub>**) was optimized using density functional theory (DFT). We are not able to optimize other donor-acceptor pairs. Excitation energies were calculated using B3LYP functional with 6-31+g(d) basis set except for Br and I.<sup>[S1,S2]</sup> For which we have used Lanl2dz functional with effective core potential. NTO calculations were done after TDDFT calculations. No solvent corrections were added in this work. The spin orbit coupling effect were considered to be a perturbation of scalar relativistic Kohn-Sham orbitals after SCF and TDDFT calculations (pSOC-TDDFT). The SOC matrix elements were calculated using B3LYP functional with a Slater type all-electron TZP basis set for all atoms as implemented in the ADF package.<sup>[S2-S6]</sup> While the excited state calculations were performed using B3LYP exchange-correlation functional with the same basis sets as mentioned before.

## 2. Synthetic Scheme and Procedure:

Pyromellitic dianhydride (PMDA) was purchased from Sigma Aldrich; Durene and 2-Ethylhexyl amine were purchased from Alfa-Aesar; 1-Bromo-4-iodobenzene and 1,4-Dibromobenzene were purchased from TCI, Acetic acid was purchased from Spectrochem and used without further purification.

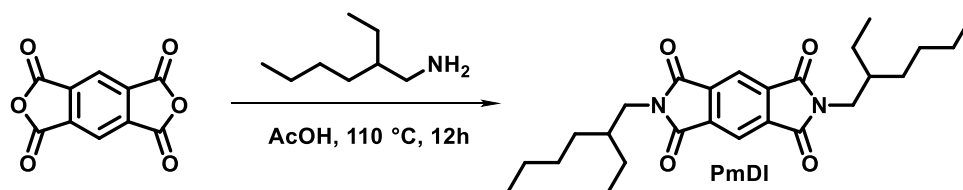

**Scheme S1.** Synthetic scheme for **PmDI** (Acceptor)

**PmDI:** Pyromellitic dianhydride (**1**) (0.50 g, 2.4mmol) was taken in a 100 mL round bottom flask and 25 mL acetic acid was added into it and stirred at room temperature for 30 minutes. 2-Ethylhexylamine (0.66 g, 5.1 mmol) was added to the reaction mixture and the reaction mixture was allowed to reflux for 12 hours. Water was added to the reaction mixture to get white precipitate. The precipitate was then filtered and dried under vacuum for 10 hours. Column chromatography was performed using chloroform as an eluent to get the pure product as white solid (0.86 g, 85 % yield). <sup>1</sup>H NMR (CDCl<sub>3</sub>, 400 MHz),  $\delta$  (ppm) = 8.26 (s, 2H), 3.64 (d, 4H, J = 7.2 Hz), 1.85 (t, 2H, J = 6 Hz), 1.55-1.26 (m, 16 H), 0.94-0.87 (m, 12

H);  $^{13}\text{C}$  NMR ( $\text{CDCl}_3$ , 100 MHz),  $\delta$  (ppm) = 166.6, 137.2, 118.2, 42.6, 38.3, 30.6, 28.5, 23.9, 23.00, 14.0  
 10.4 HRMS (APCI):  $m/z$  calculated for  $\text{C}_{26}\text{H}_{36}\text{N}_2\text{O}_4$ : 440.2675: observed 440.2760 [M] $^+$ .

### 3. Experimental Procedures

We have used the following acceptors and donors for the  $^3\text{CT}$  and  $^3\text{LE}$  phosphorescence studies. The donors  $\text{D}_1^{57}$ ,  $\text{D}_2^{58}$  and  $\text{D}_3^{59}$  were synthesized according to the literature procedures.

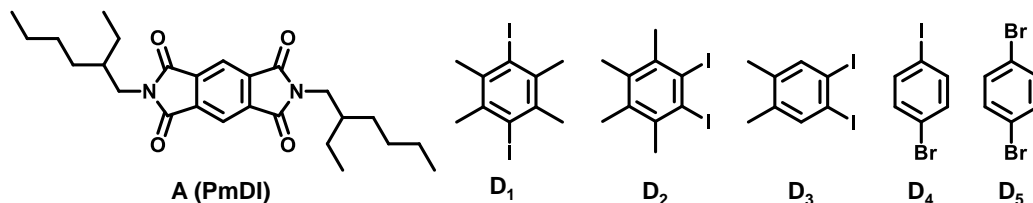

Protocol for co-crystal synthesis: We have prepared saturated solutions of both donor and acceptors in chloroform and mixed them in a 1:1 molar ratio. Then acetonitrile was added into it as a bad solvent. The mixture was heated at 70 °C for ten minutes and then kept at room temperature for crystallization. Protocol for sample preparation: All solution state studies were performed, keeping the final concentration of the samples to 0.05 mM and 0.1 mM from a stock solution of THF (1 mM). For thin films, acceptor molecules (1 mg) were mixed with 100 mg of PMMA. This mixture was then heated at 50 °C for 10 minutes followed by sonication (5 minutes) to dissolve all the components thoroughly. Then, 0.5 mL of this solution was drop-casted on a clean quartz substrate. Finally, the drop-casted thin films were dried at 60 °C for 30 minutes before performing the photophysical studies. For the phosphorescence studies of the co-crystal, a small amount of the co-crystal was placed in between two quartz plates.

### 4. Supporting Figures

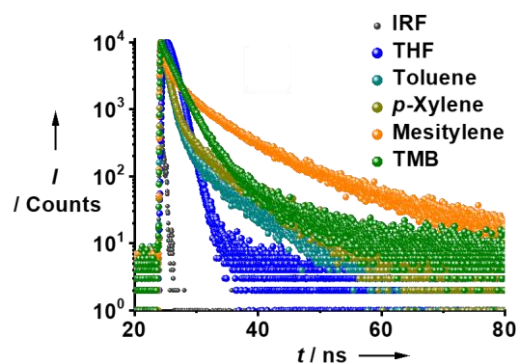

**Figure S1.** Fluorescence lifetime decay profiles of **PmDI** in various solvents:  $^1\text{LE}$  emission in THF ( $\lambda_{\text{exc.}} = 340$  nm,  $\lambda_{\text{collected}} = 420$  nm),  $^1\text{CT}$  emission in toluene, *p*-xylene, mesitylene ( $\lambda_{\text{exc.}} = 404$  nm,  $\lambda_{\text{collected}} = 500$  nm) and TMB ( $\lambda_{\text{exc.}} = 442$  nm,  $\lambda_{\text{collected}} = 500$  nm), IRF is the instrument response function ( $\tau_{\text{avg.}} = 1.82$  ns, 2.62 ns and 6.42 ns for toluene, *p*-xylene and mesitylene, respectively). Further details are mentioned in Table S1.

**Note:** Lifetime analyses show that  $^1\text{CT}$  emission of **PmDI** in various aromatic solvents have a higher lifetime than the  $^1\text{LE}$  emission in THF, further validating the CT nature of the broad emission band as a result of the CT complexation of **PmDI** with aromatic solvents.

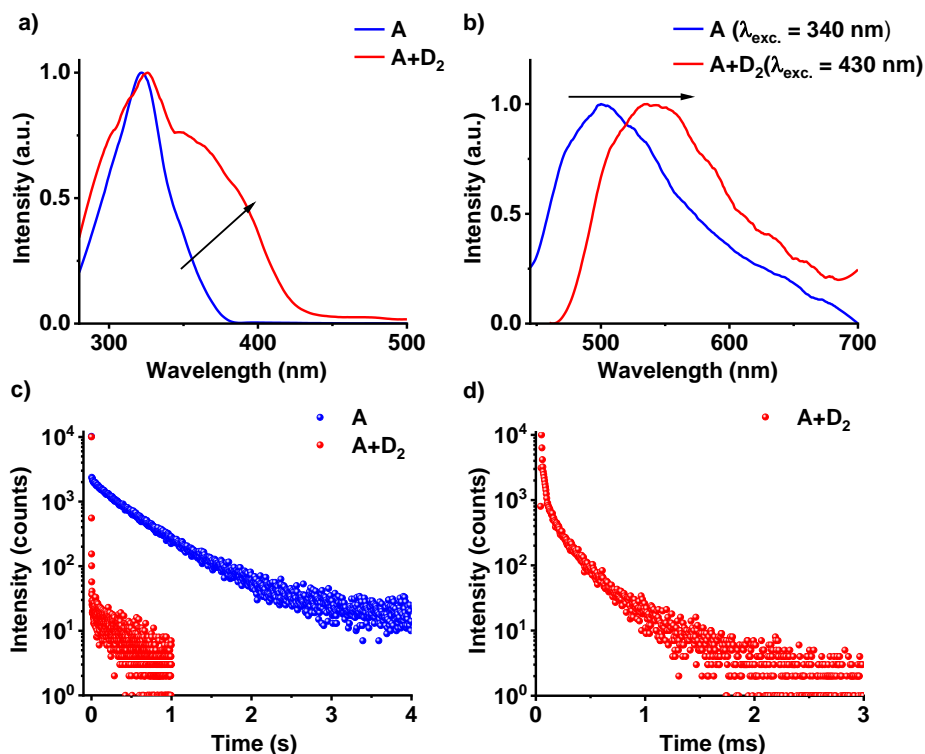

**Figure S2.** Comparison of the spectroscopic studies of **A+D<sub>2</sub>** complex and **A** alone at 77 K in THF glassy matrix: a) Excitation spectra ( $\lambda_{\text{monitored}} = 560 \text{ nm}$ ), b) delayed emission spectra (delay time = 0.5 ms). Corresponding lifetime decay profiles when excited at c)  $\lambda_{\text{exc.}} = 340 \text{ nm}$ , ( $\tau_{\text{avg.}} = 0.48 \text{ s}$  and for **A** alone and  $\tau_{\text{avg.}} = 0.33 \text{ s}$  (excluding fast component) for **A+D<sub>2</sub>**), and d)  $\lambda_{\text{exc.}} = 430 \text{ nm}$  ( $\tau_{\text{avg.}} = 0.16 \text{ ms}$ ). In both cases the emission collected at 560 nm. (Concentration of each component is 0.1 mM). Further details of lifetimes are mentioned in Table S2.

**Note:** a) Excitation spectra of **A+D<sub>2</sub>** pair shows red-shifted band compared to the bare acceptor (**A**), suggesting the formation of CT complex even in solution under cryogenic conditions. Emission spectrum of **A+D<sub>2</sub>** gets red-shifted by 44 nm ( $\lambda_{\text{max.}} = 544 \text{ nm}$ ) compared to **A** upon direct excitation at the CT band ( $\lambda_{\text{exc.}} = 430 \text{ nm}$ ) pointing towards the CT nature of the phosphorescence emission. Unlike **A**, the sharp decay component in the lifetime decay plot of **A+D<sub>2</sub>** implies the formation of another state different from that of  $^3\text{LE}$  state, which is the  $^3\text{CT}$  state. However, we have successfully extracted the newly formed state upon selectively exciting at the CT band, which clearly shows a short lifetime component compared to the  $^3\text{LE}$  emission, and validated our hypothesis of  $^3\text{CT}$  state formation.

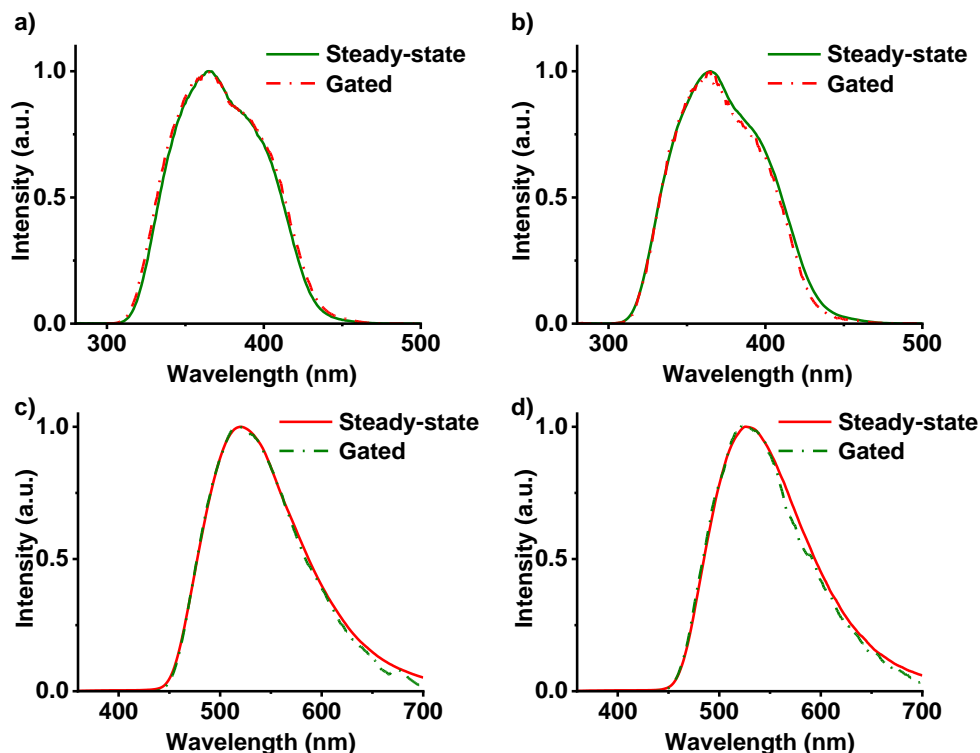

**Figure S3.** Normalized steady-state and delayed (delay time = 50  $\mu$ s) excitation (above) and emission (below) spectra of a,c) **A+D<sub>1</sub>** and b,d) **A+D<sub>2</sub>** co-crystal ( $\lambda_{\text{exc.}} = 340$  nm  $\lambda_{\text{monitored}} = 560$  nm).

**Note:** The delayed excitation spectrum validates the long-lived nature of the CT process and its role in the origin of long-lived greenish-yellow emission of the co-crystals.

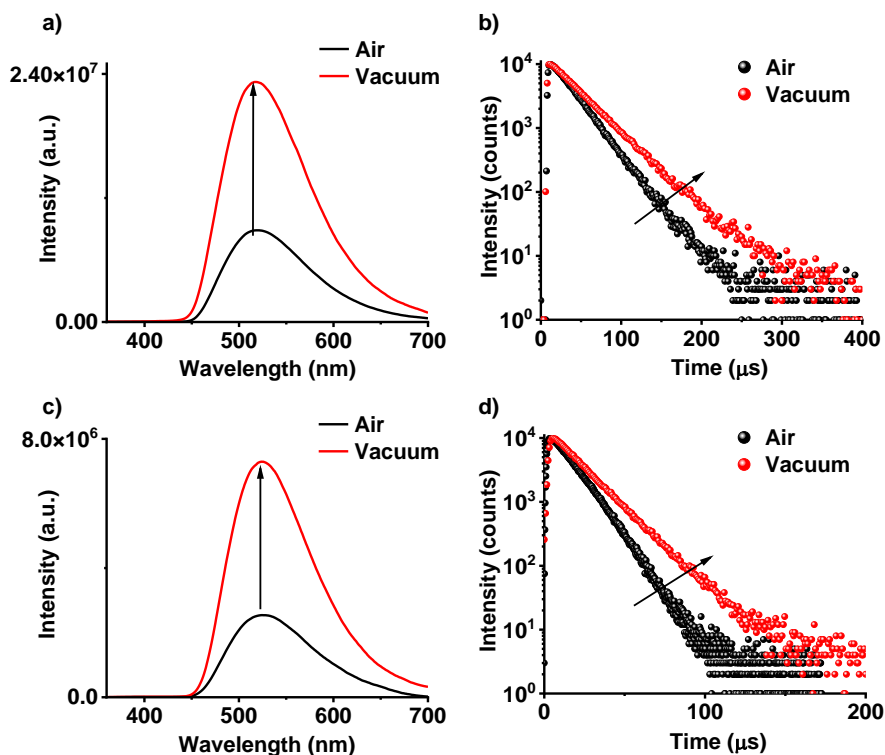

**Figure S4.** Spectroscopic studies of **A+D<sub>1</sub>** and **A+D<sub>2</sub>** co-crystals under air and vacuum: Steady-state emission spectra ( $\lambda_{\text{exc.}} = 340$  nm) of a) **A+D<sub>1</sub>** and c) **A+D<sub>2</sub>** and corresponding lifetime decay profiles ( $\lambda_{\text{exc.}} = 340$  nm,  $\lambda_{\text{collected}} = 560$  nm) of b) **A+D<sub>1</sub>** ( $\tau = 22.02$   $\mu\text{s}$  in air and 34.14  $\mu\text{s}$  in vacuum) and d) **A+D<sub>2</sub>** ( $\tau = 12.24$   $\mu\text{s}$  in air and 17.39  $\mu\text{s}$  in vacuum). Further details of lifetimes are mentioned in Table S3.

**Note:** Increase in the emission intensity and lifetime under vacuum confirms the presence of triplet contribution to the emission from the co-crystals.

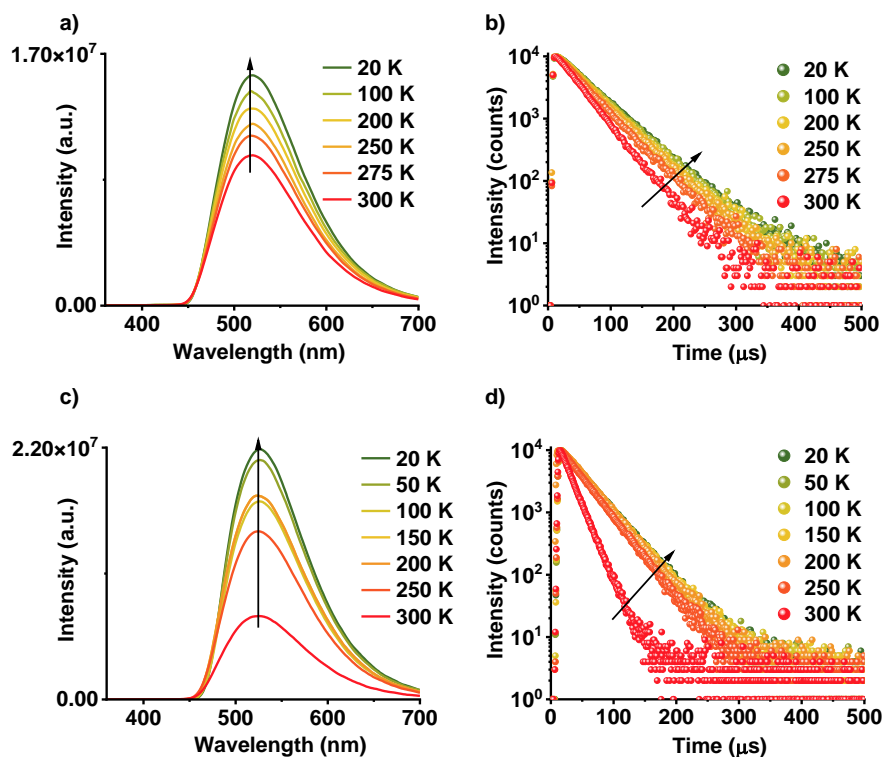

**Figure S5.** Temperature dependent studies of **A+D<sub>1</sub>** and **A+D<sub>2</sub>** co-crystals: Steady-state emission spectra ( $\lambda_{\text{exc.}} = 340$  nm) of a) **A+D<sub>1</sub>** and c) **A+D<sub>2</sub>**. Corresponding lifetime decay profiles ( $\lambda_{\text{exc.}} = 340$  nm,  $\lambda_{\text{collected}} = 560$  nm) of b) **A+D<sub>1</sub>** ( $\tau = 48.47$   $\mu\text{s}$  at 20 K and 24.12  $\mu\text{s}$  at 300 K), and d) **A+D<sub>2</sub>** ( $\tau = 35.83$   $\mu\text{s}$  at 20 K and 17.39  $\mu\text{s}$  at 300 K). Further details of lifetimes are mentioned in Table S4.

**Note:** The increase in the emission intensity (a,c) and lifetime (b,d) upon decreasing the temperature confirm the phosphorescence nature of the emission.

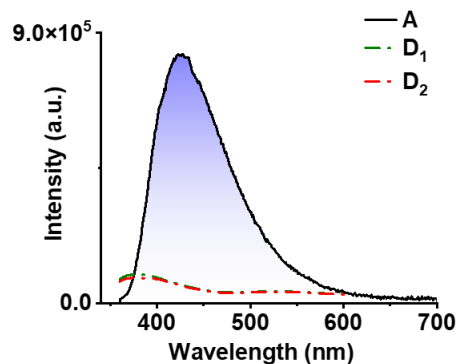

**Figure S6.** Steady-state emission spectra of individual donors ( $D_1$  and  $D_2$ ), acceptor (**A**) shows weakly emissive nature of individual donors and acceptor ( $\lambda_{exc.} = 340$  nm).

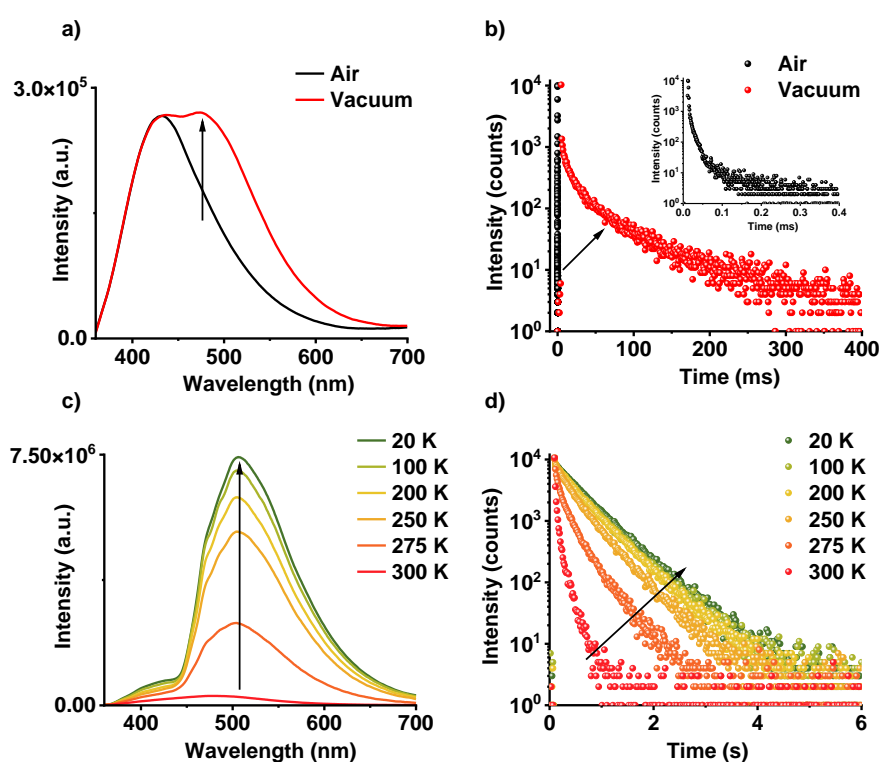

**Figure S7.** Spectroscopic studies under de-aerated conditions and temperature dependent studies of **A** (**PmDI**) in PMMA films (1 wt.% of **A** doped in PMMA matrix): a) Steady-state emission spectra ( $\lambda_{exc.} = 340$  nm) and b) lifetime decay profile ( $\lambda_{exc.} = 340$  nm,  $\lambda_{collected} = 500$  nm) under aerated and vacuum ( $\tau_{avg.} = 7.72$   $\mu$ s in air and  $\tau_{avg.} = 30.79$  ms in vacuum). Inset represents the zoomed in lifetime decay profile in presence of air. c) Steady-state emission spectra ( $\lambda_{exc.} = 340$  nm) and d) lifetime decay profile ( $\lambda_{exc.} = 340$  nm,  $\lambda_{collected} = 500$  nm) in variable temperature measurements ( $\tau_{avg.} = 525$  ms at 20 K and 77 ms at 300 K). Further details of lifetimes are mentioned in Table S5.

**Note:** The increase in the (a) emission intensity and (b) lifetime under vacuum confirms the presence of triplet contribution to the emission. Further, an increase in the (c) steady-state emission intensity and

(d) lifetime upon decreasing the temperature confirms the locally excited ( $^3\text{LE}$ ) phosphorescence nature of the **PmDI** emission in the absence of any donor molecules.

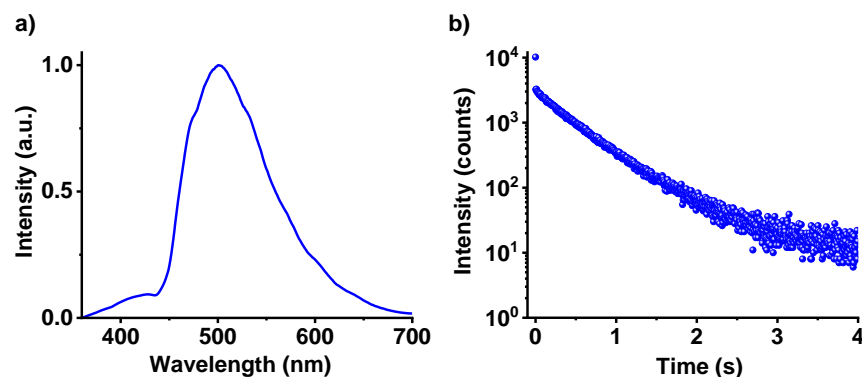

**Figure S8.** Phosphorescence study of **A** under cryogenic conditions (77 K in THF): a) Steady-state emission spectrum ( $\lambda_{\text{exc.}} = 340 \text{ nm}$ ) and b) lifetime decay profile ( $\lambda_{\text{exc.}} = 340 \text{ nm}$ ,  $\lambda_{\text{collected}} = 500 \text{ nm}$ ,  $\tau_{\text{avg.}} = 0.54 \text{ s}$ ) ( $[c] = 0.05 \text{ mM}$ ). Further details of lifetimes are mentioned in Table S6.

**Note:** Given steady-state emission spectrum and lifetime decay profile of the acceptor at very low concentration in THF glassy matrix is attested to the locally excited ( $^3\text{LE}$ ) phosphorescence emission of **PmDI** monomer in the absence of any donor molecules.

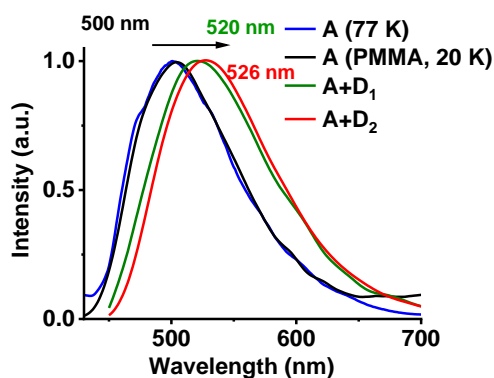

**Figure S9.** Comparison of  $^3\text{LE}$  phosphorescence of **A** alone and  $^3\text{CT}$  phosphorescence **A+D<sub>1</sub>** and **A+D<sub>2</sub>** co-crystals: Delayed emission spectra of **A** at cryogenic conditions (blue,  $[c] = 0.05 \text{ mM}$  in THF), in PMMA matrix (black, 1 wt.% of **A** doped in PMMA matrix) shows  $^3\text{LE}$  phosphorescence and **A+D<sub>1</sub>** and **A+D<sub>2</sub>** at ambient conditions show  $^3\text{CT}$  phosphorescence (delay time = 1 ms for **A** and 50 ms for **A+D<sub>1</sub>** and **A+D<sub>2</sub>**,  $\lambda_{\text{exc.}} = 340 \text{ nm}$  for **A** and 430 nm **A+D<sub>1</sub>** and **A+D<sub>2</sub>**).

**Note:** Red-shifted and broad emission spectra of **A+D<sub>1</sub>** and **A+D<sub>2</sub>** co-crystals compared to the acceptor (**A**) phosphorescence emission suggests the  $^3\text{CT}$  nature of the formers' emission.

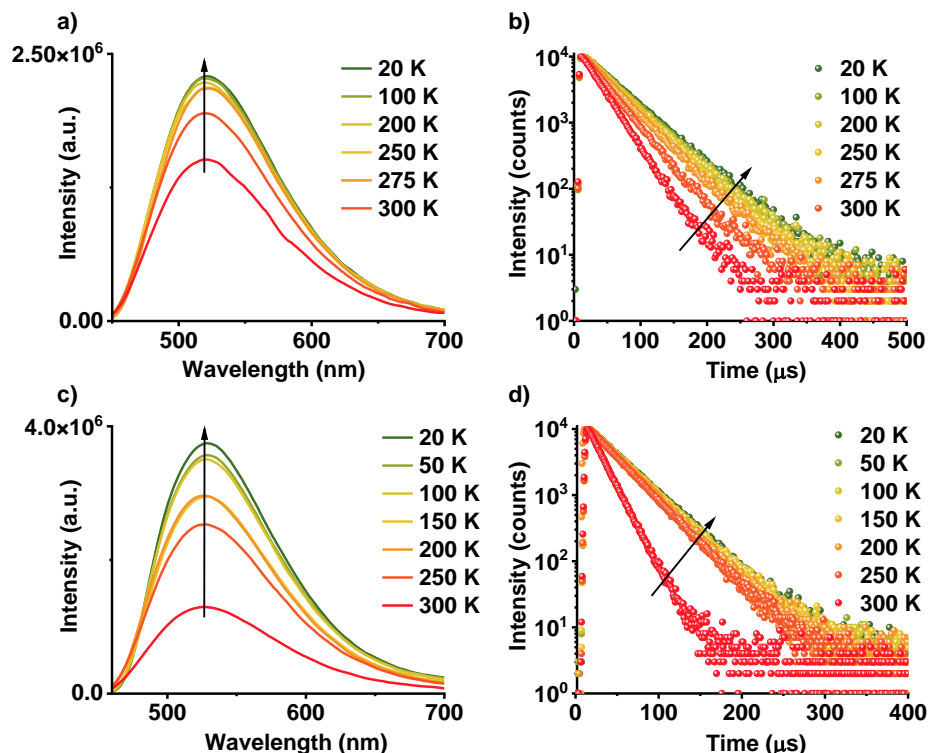

**Figure S10.** Temperature dependent studies of **A+D<sub>1</sub>** and **A+D<sub>2</sub>** co-crystals by the selective excitation at the CT absorption: Steady-state emission spectra ( $\lambda_{\text{exc.}} = 430 \text{ nm}$ ) of a) **A+D<sub>1</sub>** and c) **A+D<sub>2</sub>**. Lifetime decay profiles ( $\lambda_{\text{exc.}} = 430 \text{ nm}$ ,  $\lambda_{\text{collected}} = 560 \text{ nm}$ ) of b) **A+D<sub>1</sub>** ( $\tau = 49.39 \mu\text{s}$  at 20 K and  $35.67 \mu\text{s}$  at 300 K) and d) **A+D<sub>2</sub>** ( $\tau = 35.38 \mu\text{s}$  at 20 K and  $17.33 \mu\text{s}$  at 300 K). Further details of lifetimes are mentioned in Table S4. **Note:** Increase in the (a) emission intensity and (b) lifetime upon decreasing the temperature on selective excitation at the CT band hints towards the phosphorescence nature of the CT emission.

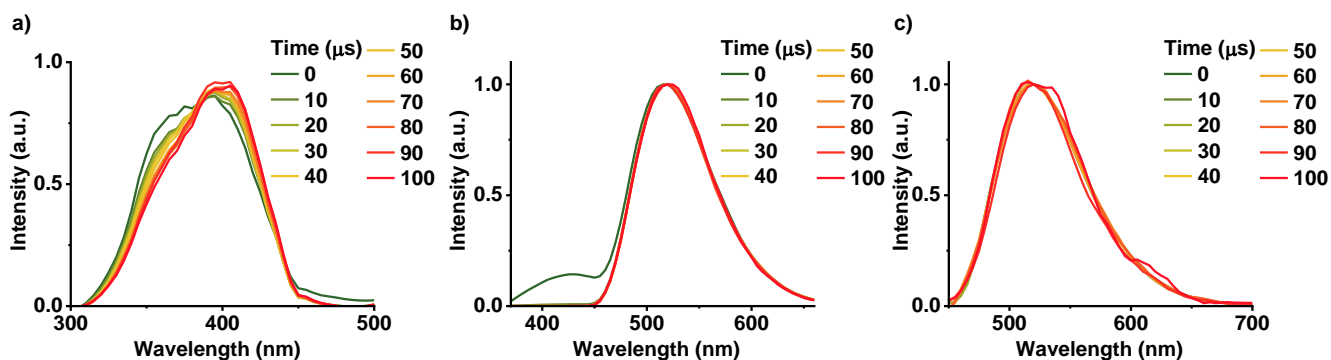

**Figure S11.** Time-resolved a) excitation spectra, ( $\lambda_{\text{monitored}} = 560 \text{ nm}$ ), b) emission spectra upon exciting at  $\lambda_{\text{exc.}} = 340 \text{ nm}$  and c) upon selective excitation at the CT band ( $\lambda_{\text{exc.}} = 430 \text{ nm}$ ) of **A+D<sub>1</sub>** co-crystal.

**Note:** Time-resolved emission experiments indicate no spectral changes with gradual progress in time, suggesting that emission comes from the same excited state, i.e.,  $^3\text{CT}$  state and there is no transfer of excitons to other excited states.

Bond precision: C-C = 0.0355 Å Wavelength=0.71073

Cell: a=5.4537 (5) b=38.527 (4) c=15.1042 (15)  
 alpha=90 beta=93.702 (4) gamma=90

Temperature: 300 K

|                        | Calculated                                           | Reported                         |
|------------------------|------------------------------------------------------|----------------------------------|
| Volume                 | 3167.0 (5)                                           | 3167.0 (5)                       |
| Space group            | P 21/m                                               | P 21/m                           |
| Hall group             | -P 2yb                                               | -P 2yb                           |
| Moiety formula         | C26 H36 N2 O4, C24 H30 N2<br>O4, C10 H12 I2, 2(C H3) | ?                                |
| Sum formula            | C62 H84 I2 N4 O8                                     | C3.35 H4.54 I0.11 N0.22<br>O0.16 |
| Mr                     | 1267.13                                              | 64.17                            |
| Dx, g cm <sup>-3</sup> | 1.329                                                | 1.245                            |
| Z                      | 2                                                    | 37                               |
| Mu (mm <sup>-1</sup> ) | 1.046                                                | 1.036                            |
| F000                   | 1308.0                                               | 1228.0                           |
| F000'                  | 1306.59                                              |                                  |
| h, k, lmax             | 6, 45, 17                                            | 6, 45, 17                        |
| Nref                   | 5692                                                 | 5689                             |
| Tmin, Tmax             | 0.847, 0.950                                         | 0.518, 0.746                     |
| Tmin'                  | 0.847                                                |                                  |

Correction method= # Reported T Limits: Tmin=0.518 Tmax=0.746  
 AbsCorr = MULTI-SCAN

Data completeness= 0.999 Theta(max)= 24.999

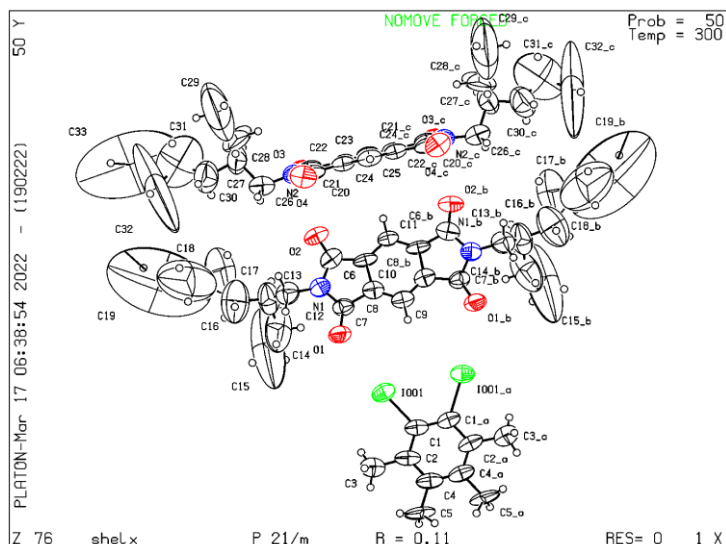

**Figure S12.** Structure data and cell parameters of **A+D<sub>2</sub>** single crystal. CCDC Number is 2159661.

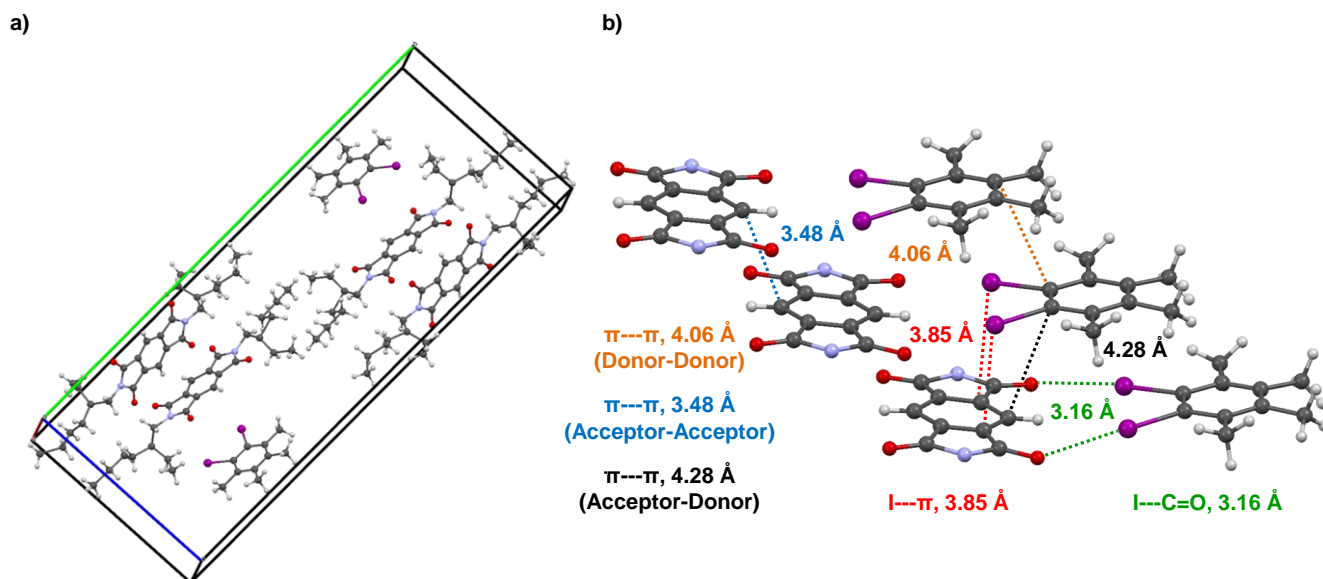

**Figure S13.** a) Unit cell and b) slipped stacked arrangement of acceptor and donor showing various intermolecular halogen-carbonyl interactions of **A+D<sub>2</sub>** single crystal (we have removed ethyl hexyl chain for better illustration).

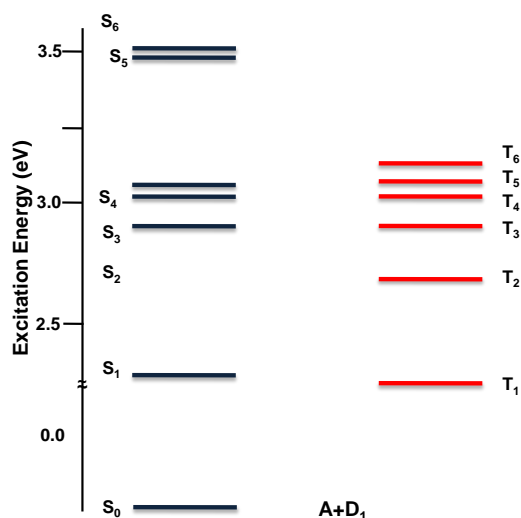

**Figure S14.** Excitation energies of **A+D<sub>1</sub>** obtained from TDDFT calculation in the ground state geometry using B3LYP functional in conjunction with 6-31+g(d) basis set for C, H, N, O and LANL2DZ basis set for I with effective core potential.

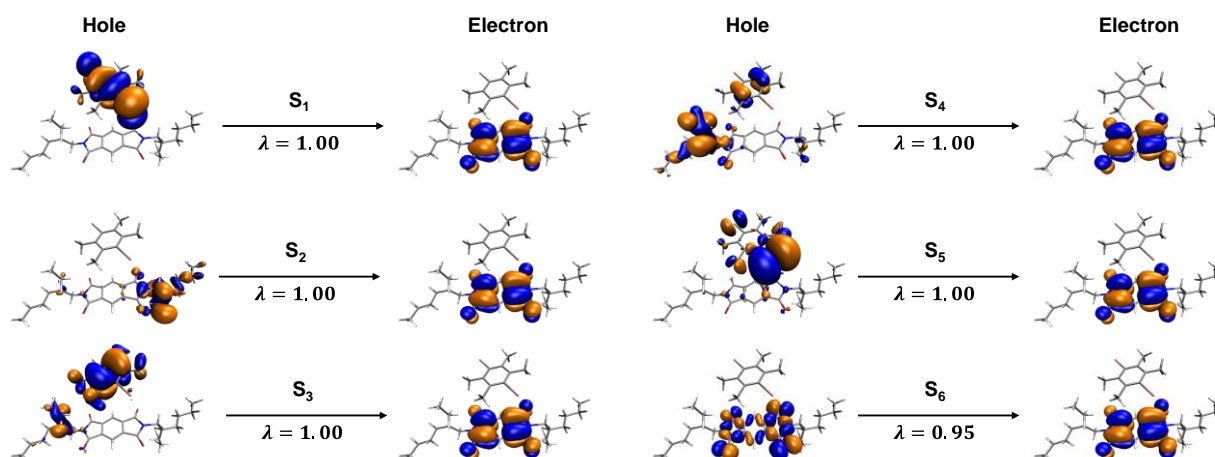

**Figure S15.** Natural Transition Orbitals (NTOs) for **A+D<sub>1</sub>**. Singlet states are calculated at TD-B3LYP level with 6-31+g(d) basis set for C, H, O and N and LANL2DZ basis set for I with effective core potential,  $\lambda$  is the maximum value of singular value decomposition (SVD).

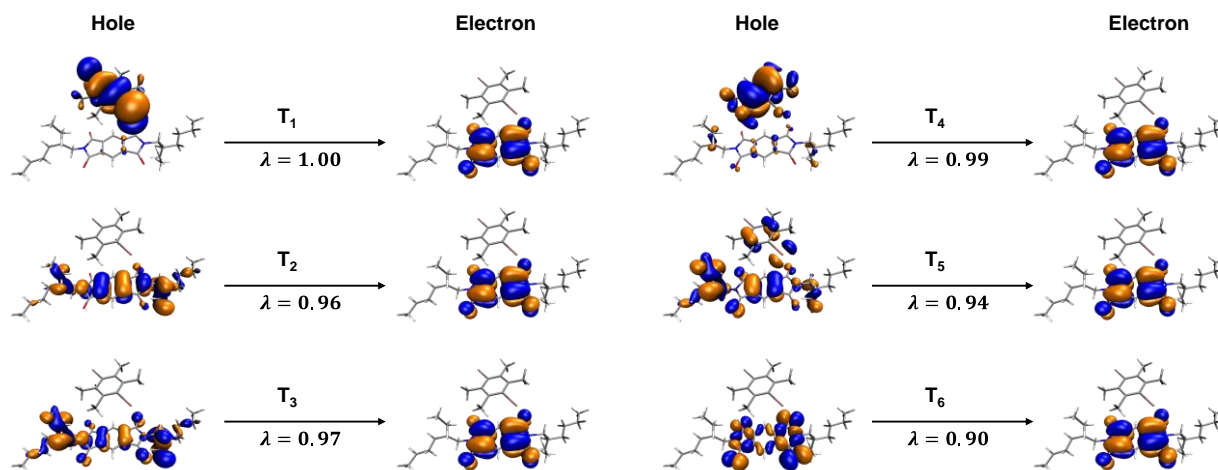

**Figure S16.** Natural Transition Orbitals (NTOs) for **A+D<sub>1</sub>**. Triplet states are calculated at TD-CAMB3LYP level with 6-31+g(d) basis set for C, H, O and N and LANL2DZ basis set for Br and I with effective core potential,  $\lambda$  is the maximum value of singular value decomposition (SVD).

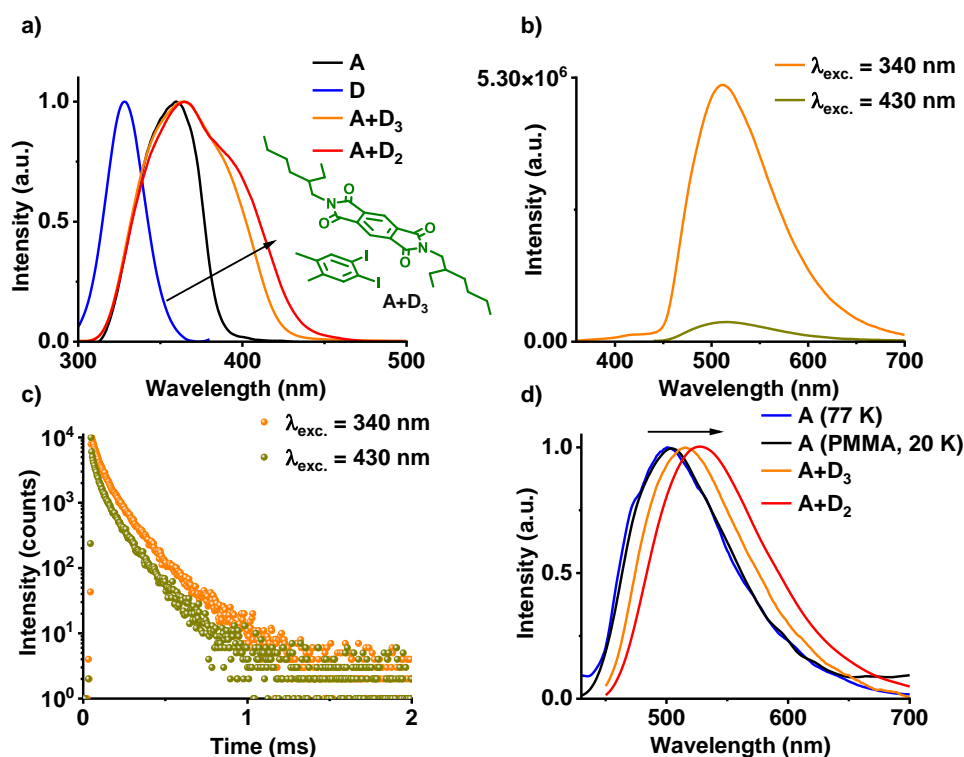

**Figure S17.** <sup>3</sup>CT phosphorescence studies of **A+D<sub>3</sub>** co-crystals and comparison with the <sup>3</sup>LE phosphorescence of **A** alone and <sup>3</sup>CT phosphorescence **A+D<sub>2</sub>** co-crystals: a) Excitation spectra of acceptor (**A**) alone and donor-acceptor co-crystal **A+D<sub>2</sub>** (red line), **A+D<sub>3</sub>** (orange line), red-shifted band of donor-acceptor co-crystal compared to the bare acceptor (**A**) phosphorescence emission suggests the formation of CT state ( $\lambda_{\text{monitored}} = 560 \text{ nm}$ ). b) Steady-state emission spectra of donor-acceptor co-crystal (**A+D<sub>3</sub>**). c) Corresponding lifetime decay profiles when excited at LE ( $\lambda_{\text{exc}} = 340 \text{ nm}$ ) and CT ( $\lambda_{\text{exc}} = 430 \text{ nm}$ ) band, in both cases the emission collected at 560 nm ( $\tau_{\text{avg}} = 106.6 \mu\text{s}$  in air upon 340 nm excitation). d) Delayed

emission spectra of acceptor (**A**) alone at cryogenic conditions ( $[c] = 0.05$  mM in THF) and in PMMA matrix (1 wt.% of **A** doped in PMMA matrix) show  $^3\text{LE}$  phosphorescence, and **A**+**D**<sub>2</sub> and **A**+**D**<sub>3</sub> in air show  $^3\text{CT}$  phosphorescence (delay time = 1 ms for **A** and 50  $\mu\text{s}$  for **A**+**D**<sub>2</sub> and **A**+**D**<sub>3</sub>). Further details of lifetimes are mentioned in Table S7.

**Note:** Here, we have used a donor **D**<sub>3</sub> with less electron-donating capability (two methyl groups are removed), which results in decrease in the extend of CT as evident from the excitation spectra. The CT band of **A**+**D**<sub>3</sub> is blue-shifted compared to **A**+**D**<sub>2</sub>, confirming reduced CT complexation in former when compared to latter. In addition, the comparison of the normalized delayed emission spectra (d) of **A** ( $^3\text{LE}$ ), **A**+**D**<sub>2</sub> and **A**+**D**<sub>3</sub> ( $^3\text{CT}$ ) reiterates the possibility of modulation of emission by varying the donor strength.

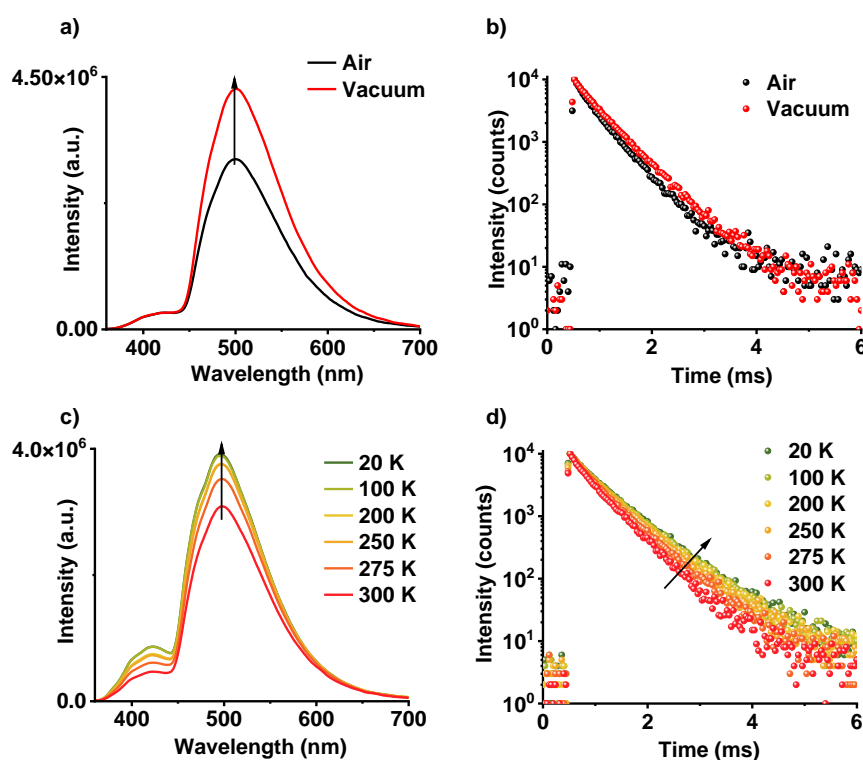

**Figure S18.** Spectroscopic studies in de-aerated conditions and temperature dependent studies of **A**+**D**<sub>4</sub> co-crystal: a) Steady-state emission spectra ( $\lambda_{\text{exc.}} = 340$  nm) and b) corresponding lifetime decay profiles ( $\lambda_{\text{exc.}} = 340$  nm,  $\lambda_{\text{collected}} = 560$  nm) under air and vacuum ( $\tau_{\text{avg}} = 0.38$  ms in air and, 0.41 ms in vacuum). c) Steady-state emission spectra ( $\lambda_{\text{exc.}} = 340$  nm) and b) corresponding lifetime decay profile ( $\lambda_{\text{exc.}} = 340$  nm,  $\lambda_{\text{collected}} = 560$  nm,  $\tau_{\text{avg}} = 0.61$  ms at 20 K and 0.49 at 300 K) at different temperatures. Further details of lifetimes are mentioned in Table S8.

**Note:** Increase in the (a) emission intensity and (b) lifetime under vacuum confirms the presence of triplet contribution to the emission. Further, an increase in the (c) steady-state emission intensity and (d) lifetime upon decreasing the temperature confirms the phosphorescence nature of the emission.

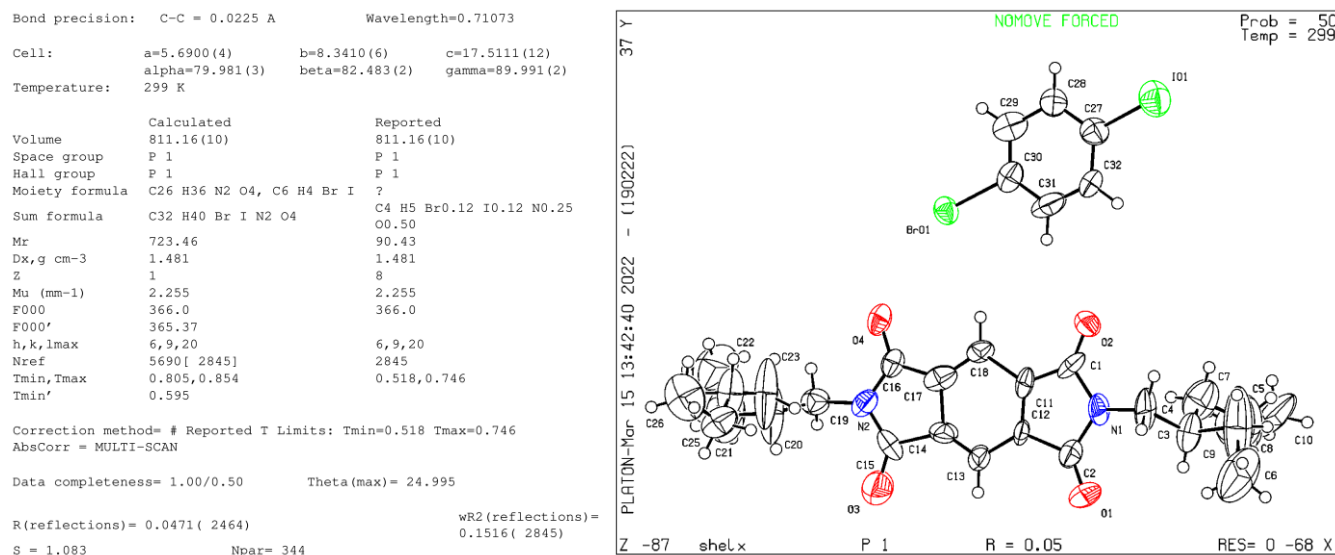

**Figure S19.** Structure data and cell parameters of **A+D<sub>4</sub>** single crystal. CCDC Number is 2159217.

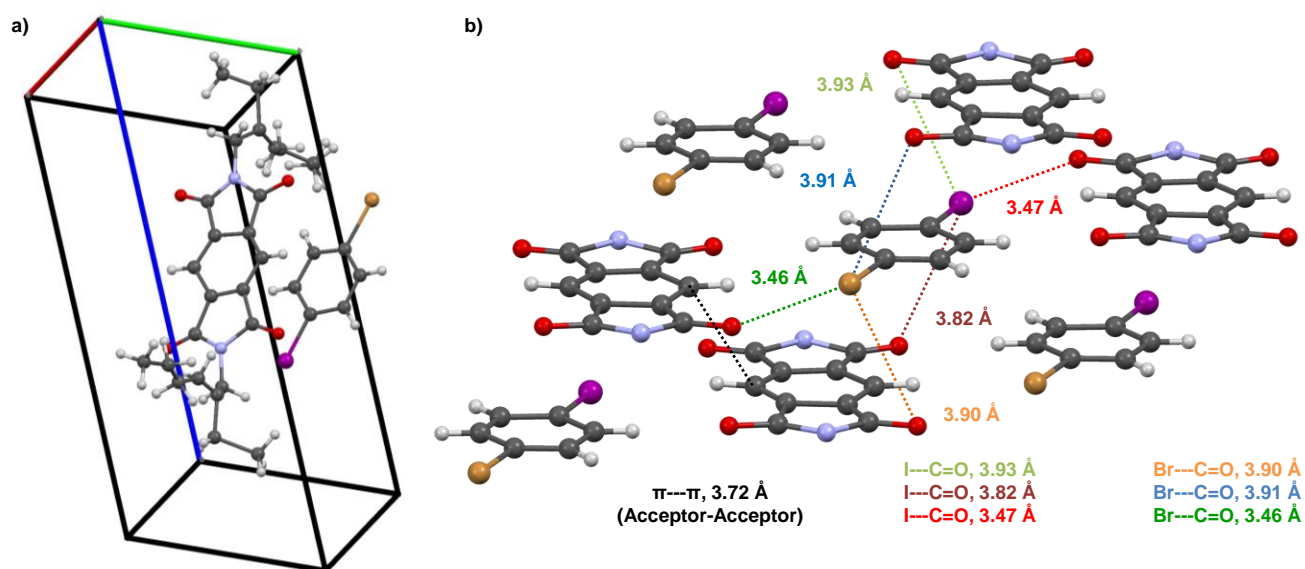

**Figure S20.** a) Unit cell and b) extended single crystal structure of **A+D<sub>4</sub>** showing various intermolecular halogen bonding interactions (we have removed ethyl hexyl chain for better illustration).

**Note:** Six halogen bonding interactions (bromo-carbonyl and iodo-carbonyl) per donor molecule results in significant enhancement of the SOC value via external heavy atom effect to achieve very high phosphorescence efficiency from <sup>3</sup>LE state of **PmDI**.

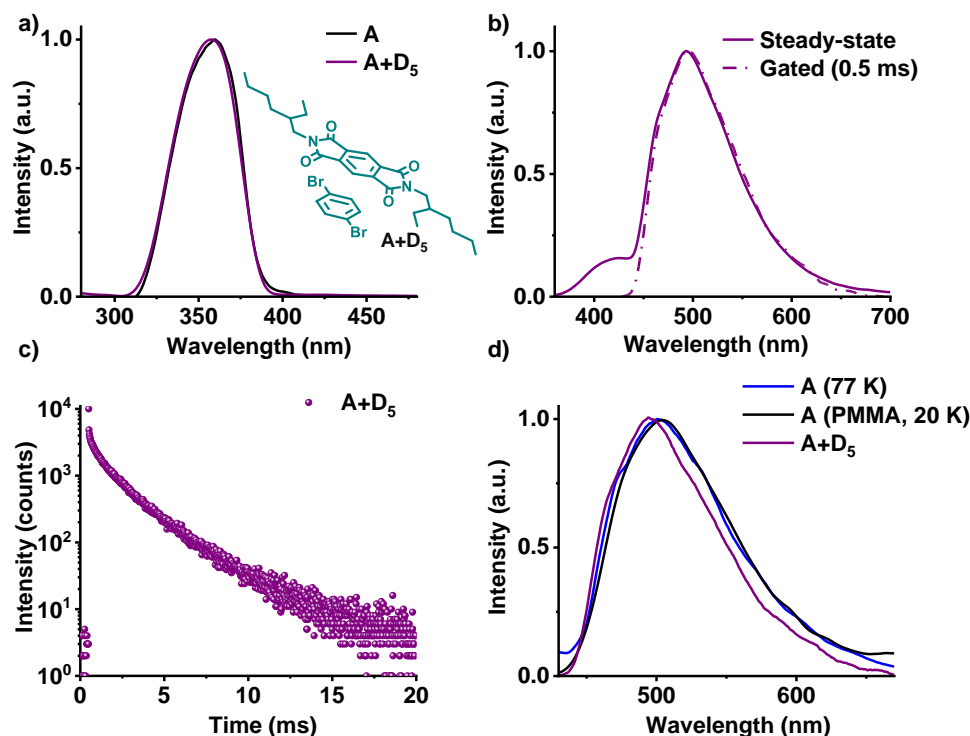

**Figure S21.** Phosphorescence studies of **A+D<sub>5</sub>** co-crystal: a) Excitation spectra of the acceptor (**A**) alone and donor-acceptor co-crystal (**A+D<sub>5</sub>**) ( $\lambda_{\text{monitored}} = 560$  nm), b) steady-state and gated emission spectra of **A+D<sub>5</sub>** co-crystal ( $\lambda_{\text{exc.}} = 340$  nm, Inset: Photograph of **A+D<sub>5</sub>** co-crystal under 365 nm UV lamp in air). c) Lifetime decay profile of **A+D<sub>5</sub>** co-crystal ( $\lambda_{\text{exc.}} = 340$  nm,  $\lambda_{\text{collected}} = 560$  nm,  $\tau_{\text{avg}} = 2.29$  ms). d) Normalized delayed emission spectra of acceptor (**A**) alone at 77 K in THF, doped in PMMA matrix at 20 K (1 wt.% with respect to PMMA) and **A+D<sub>5</sub>** at room temperature ( $\lambda_{\text{exc.}} = 340$  nm, delay time = 1 ms). Further details of lifetimes are mentioned in Table S9.

**Note:** Here, we have used 1,4-dibromobenzene as the donor (**D<sub>5</sub>**), which shows lesser heavy-atom effect compared to donor **D<sub>4</sub>**. The excitation spectrum of **A+D<sub>5</sub>** is similar to **A** which indicates that no CT complexation is present in the former. Similarly, the gated emission spectra of **A** and **A+D<sub>5</sub>** are exactly similar suggesting the origin of co-crystal emission to be the <sup>3</sup>LE phosphorescence of **PmDI**. However, the decreased heavy atom effect is reflected in the quantum yield measurement, where **A+D<sub>5</sub>** shows a quantum yield of 11 %, much lesser than that of **A+D<sub>4</sub>** (52 %), indicating the role of the heavy iodine atom in **A+D<sub>4</sub>** co-crystal.

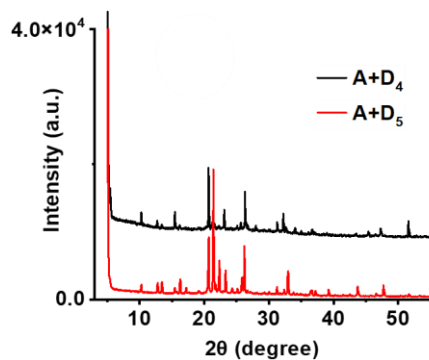

**Figure S22.** Powder XRD pattern of **A+D<sub>4</sub>** and **A+D<sub>5</sub>** co-crystals.

**Note:** PXRD suggests that the molecular packing of **A+D<sub>4</sub>** and **A+D<sub>5</sub>** co-crystals are similar.

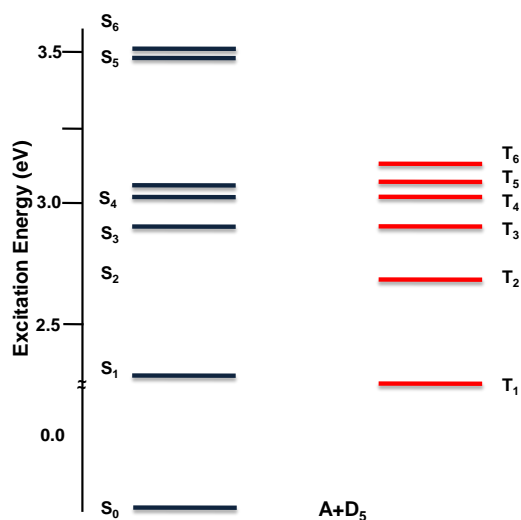

**Figure S23.** Excitation energies of **A+D<sub>5</sub>** pair obtained from TDDFT calculation in the ground state geometry using B3LYP functional in conjunction with 6-31+g(d) basis set for C, H, N, O and LANL2DZ basis set for Br with effective core potential.

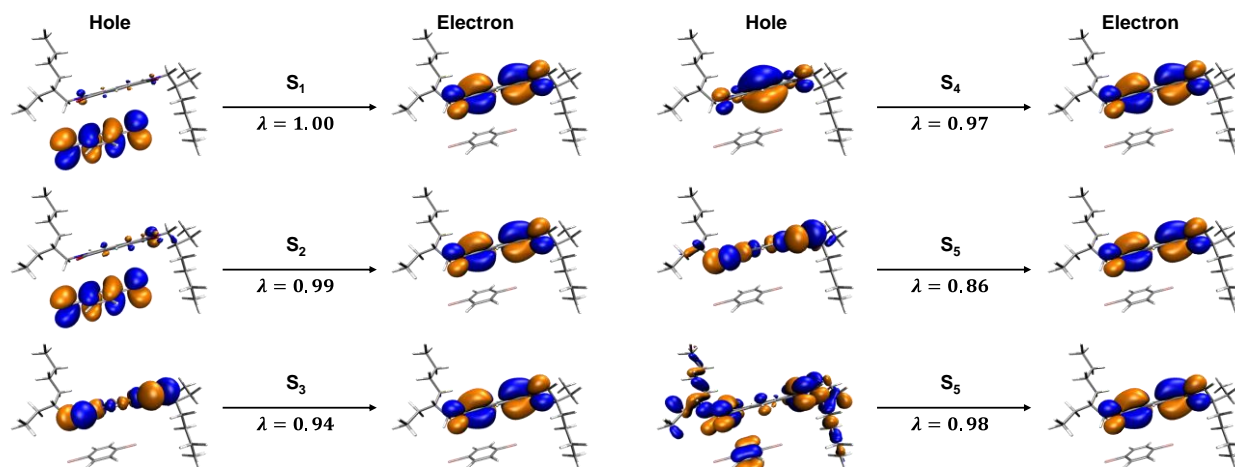

**Figure S24.** Natural Transition Orbitals (NTOs) for **A+D<sub>5</sub>**. Singlet states calculated at TD-B3LYP level with 6-31+g(d) basis set for C, H, O and N and LANL2DZ basis set for I with effective core potential,  $\lambda$  is the maximum value of singular value decomposition (SVD).

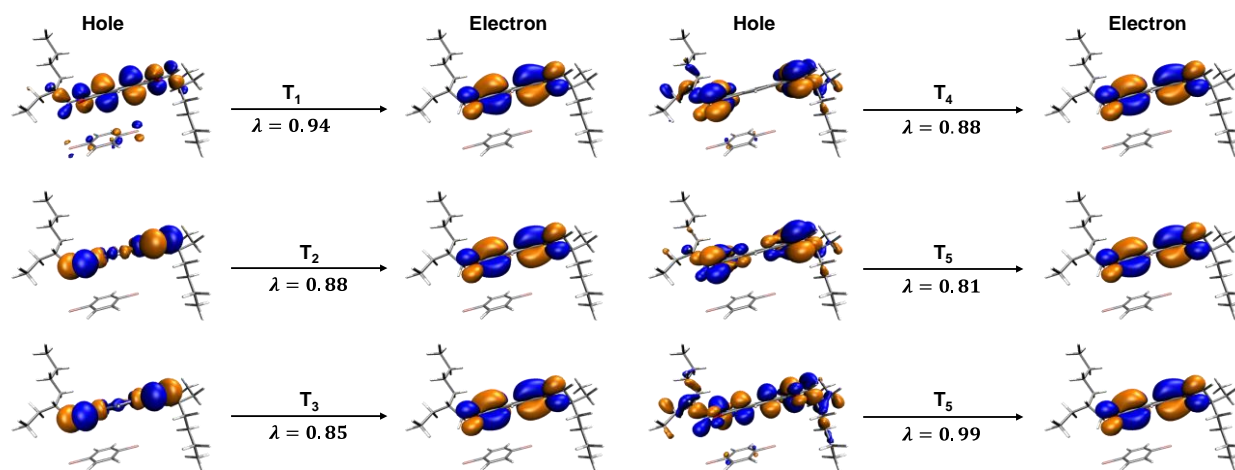

**Figure S25.** Natural Transition Orbitals (NTOs) for **A+D<sub>5</sub>**. Triplet states calculated at TD-B3LYP level with 6-31+g(d) basis set for C, H, O and N and LANL2DZ basis set for Br and I with effective core potential,  $\lambda$  is the maximum value of singular value decomposition (SVD).

**Note:** The absence of CT complexation between **D<sub>5</sub>** with the **PmDI** core (acceptor) is clear from the computed natural transition orbitals (NTOs) of the first excited singlet ( $S_1$ ) and triplet ( $T_1$ ) states, where the hole and electron both are located on the  $\pi$ -surface of the acceptor, suggesting towards the LE transition.

**Table S1.** Summary of fluorescence decay of **PmDI (A)** in various solvents.

| Solvents         | $\lambda_{\text{exc.}}$ (nm) | $\lambda_{\text{collected}}$ (nm) | $\tau_1$ (ns) | $\tau_2$ (ns) | $\tau_3$ (ns) | $\langle\tau_{\text{avg}}\rangle$ (ns) |
|------------------|------------------------------|-----------------------------------|---------------|---------------|---------------|----------------------------------------|
| THF              | 340                          | 420                               | 0.80 (95%)    | 2.00 (5%)     | -             | 0.86                                   |
| Toluene          | 404                          | 500                               | 0.53 (38%)    | 1.25 (48%)    | 7.29 (14%)    | 1.82                                   |
| <i>p</i> -Xylene | 404                          | 500                               | 2.52 (20%)    | 0.74 (61%)    | 8.78 (19%)    | 2.62                                   |
| Mesitylene       | 404                          | 500                               | 3.10 (45%)    | 10.63 (47%)   | 0.41 (8%)     | 6.42                                   |
| TMB              | 442                          | 500                               | 0.37 (12%)    | 2.16 (79%)    | 9.00 (9%)     | 2.56                                   |

**Table S2.** Summary of phosphorescence decay of **A+D<sub>2</sub>** complex and **A** alone at 77 K in THF glassy matrix.

|                        | $\lambda_{\text{exc.}}$ (nm) | $\lambda_{\text{collected}}$ (nm) | $\tau_1$ (s)   | $\tau_2$ (s)  | $\tau_3$ (s)  | $\langle \tau_{\text{avg.}} \rangle$ (s) |
|------------------------|------------------------------|-----------------------------------|----------------|---------------|---------------|------------------------------------------|
| <b>A</b>               | 340                          | 560                               | 0.28 (27%)     | 0.56 (73%)    | -             | 0.48                                     |
| <b>A+D<sub>2</sub></b> | 340                          | 560                               | 0.33 (100%)    | -             | -             | 0.33                                     |
| <b>A+D<sub>2</sub></b> | 430                          | 560                               | 0.016 ms (32%) | 0.11 ms (39%) | 0.37 ms (29%) | 0.16 ms                                  |

**Table S3.** Summary of phosphorescence decay of **A+D<sub>1</sub>** and **A+D<sub>2</sub>** co-crystals under air and vacuum.

|                                  | $\lambda_{\text{exc.}}$ (nm) | $\lambda_{\text{collected}}$ (nm) | $\tau$ ( $\mu$ s) |
|----------------------------------|------------------------------|-----------------------------------|-------------------|
| <b>A+D<sub>1</sub></b> in Air    | 340                          | 560                               | 22.02 (100%)      |
| <b>A+D<sub>1</sub></b> in Vacuum | 340                          | 560                               | 34.14 (100%)      |
| <b>A+D<sub>2</sub></b> in Air    | 340                          | 560                               | 12.24 (100%)      |
| <b>A+D<sub>2</sub></b> Vacuum    | 340                          | 560                               | 17.39 (100%)      |

**Table S4.** Summary of phosphorescence decay of **A+D<sub>1</sub>** and **A+D<sub>2</sub>** co-crystals in different temperature.

|                        | $\lambda_{\text{exc.}}$ (nm) | $\lambda_{\text{collected}}$ (nm) | $\tau$ ( $\mu$ s) at 20 K | $\tau$ ( $\mu$ s) at 300 K |
|------------------------|------------------------------|-----------------------------------|---------------------------|----------------------------|
| <b>A+D<sub>1</sub></b> | 340                          | 560                               | 48.47 (100%)              | 34.12 (100%)               |
| <b>A+D<sub>1</sub></b> | 430                          | 560                               | 49.39 (100%)              | 35.67 (100%)               |
| <b>A+D<sub>2</sub></b> | 340                          | 560                               | 35.83 (100%)              | 17.39 (100%)               |
| <b>A+D<sub>2</sub></b> | 430                          | 560                               | 35.38 (100%)              | 17.33 (100%)               |

**Table S5.** Summary of phosphorescence decay of **PmDI**, doped in PMMA matrix (1 wt.% with respect to PMMA) in de-aerated conditions and in different temperature.

|        | $\lambda_{exc.}(nm)$ | $\lambda_{collected}(nm)$ | $\tau_1(ms)$        | $\tau_2(ms)$         | $\tau_3(ms)$        | $\langle\tau_{avg}\rangle(ms)$ |
|--------|----------------------|---------------------------|---------------------|----------------------|---------------------|--------------------------------|
| Air    | 340                  | 500                       | 1.09 $\mu s$ (66 %) | 10.35 $\mu s$ (28 %) | 68.37 $\mu s$ (5 %) | 7.72 $\mu s$                   |
| Vacuum | 340                  | 500                       | 4.28 (10 %)         | 19.57 (43 %)         | 77.86 (47 %)        | 30.79                          |
| 20 K   | 340                  | 500                       | 340 (22%)           | 590 (78 %)           | -                   | 535                            |
| 300 K  | 340                  | 500                       | 30.80 (60 %)        | 147 (40 %)           | -                   | 77.28                          |

**Table S6.** Summary of phosphorescence decay of **PmDI (A)** under cryogenic conditions (77 K in THF, [c] = 0.05 mM).

|      | $\lambda_{exc.}(nm)$ | $\lambda_{collected}(nm)$ | $\tau_1(s)$  | $\tau_2(s)$  | $\tau_3(s)$ | $\langle\tau_{avg}\rangle(s)$ |
|------|----------------------|---------------------------|--------------|--------------|-------------|-------------------------------|
| 77 K | 340                  | 500                       | 0.298 (26 %) | 0.595 (78 %) | -           | 0.54                          |

**Table S7.** Summary  $k_{pr}(s^{-1})$ ,  $k_{ISC}(s^{-1})$ , and  $k_{nr}(s^{-1})$  of **A+D<sub>1</sub>**, **A+D<sub>2</sub>**, **A+D<sub>3</sub>**, **A+D<sub>4</sub>** and **A+D<sub>5</sub>** co-crystals.

| Co-crystals            | $\Phi_P$ | $\langle\tau\rangle_F$                                               | $k_{ISC} = \Phi_P/\langle\tau\rangle_F$ |
|------------------------|----------|----------------------------------------------------------------------|-----------------------------------------|
| <b>A+D<sub>1</sub></b> | 46 %     | 13.3 ns ( $\lambda_{exc.} = 442$ nm, $\lambda_{collected} = 460$ nm) | $3.46 \times 10^{-9} s^{-1}$            |
| <b>A+D<sub>2</sub></b> | 43 %     | 13.3 ns ( $\lambda_{exc.} = 442$ nm, $\lambda_{collected} = 460$ nm) | $3.23 \times 10^{-9} s^{-1}$            |
| <b>A+D<sub>3</sub></b> | 42 %     | 13.4 ns ( $\lambda_{exc.} = 442$ nm, $\lambda_{collected} = 460$ nm) | $3.13 \times 10^{-9} s^{-1}$            |
| <b>A+D<sub>4</sub></b> | 52 %     | 1.8 ns ( $\lambda_{exc.} = 373$ nm, $\lambda_{collected} = 430$ nm)  | $2.88 \times 10^{-8} s^{-1}$            |
| <b>A+D<sub>5</sub></b> | 11 %     | 1.3 ns ( $\lambda_{exc.} = 442$ nm, $\lambda_{collected} = 430$ nm)  | $8.46 \times 10^{-9} s^{-1}$            |

**Table S8.** Summary of phosphorescence decay of **A+D<sub>3</sub>** co-crystal.

| Co-crystals            | $\langle S H_{SO} T \rangle$ | $T_1$ |
|------------------------|------------------------------|-------|
| <b>A+D<sub>1</sub></b> | S <sub>0</sub>               | 34.21 |
| <b>A+D<sub>2</sub></b> | S <sub>0</sub>               | 63.94 |
| <b>A+D<sub>4</sub></b> | S <sub>0</sub>               | 17.73 |
| <b>A+D<sub>5</sub></b> | S <sub>0</sub>               | 10.45 |

**Table S9.** Summary of phosphorescence decay of **A+D<sub>3</sub>** co-crystal.

| $\lambda_{\text{exc.}}$ (nm) | $\lambda_{\text{collected}}$ (nm) | $\tau_1$ ( $\mu\text{s}$ ) | $\tau_2$ ( $\mu\text{s}$ ) | $\langle\tau_{\text{avg.}}\rangle$ ( $\mu\text{s}$ ) |
|------------------------------|-----------------------------------|----------------------------|----------------------------|------------------------------------------------------|
| 340                          | 560                               | 47.60 (47 %)               | 159 (53 %)                 | 106.64                                               |
| 430                          | 560                               | 33.10 (39 %)               | 132 (61 %)                 | 93.43                                                |

**Table S10.** Summary of phosphorescence decay of **A+D<sub>4</sub>** co-crystals in de-aerated conditions and in different temperature.

|        | $\lambda_{\text{exc.}}$ (nm) | $\lambda_{\text{collected}}$ (nm) | $\tau_1$ (ms) | $\tau_2$ (ms) | $\tau_3$ (ms) | $\langle\tau_{\text{avg.}}\rangle$ (ms) |
|--------|------------------------------|-----------------------------------|---------------|---------------|---------------|-----------------------------------------|
| Air    | 340                          | 500                               | 0.22 (35 %)   | 0.47 (65 %)   | -             | 0.38                                    |
| Vacuum | 340                          | 500                               | 0.19 (28 %)   | 0.49 (72 %)   | -             | 0.406                                   |
| 20 K   | 340                          | 500                               | 0.026 (14 %)  | 0.668 (85 %)  | 3.32 (1 %)    | 0.61                                    |
| 300 K  | 340                          | 500                               | 0.17 (10 %)   | 0.51 (89 %)   | 1.64 (1 %)    | 0.49                                    |

**Table S11.** Summary of phosphorescence decay of **A+D<sub>5</sub>** co-crystals.

| $\lambda_{\text{exc.}}$ (nm) | $\lambda_{\text{collected}}$ (nm) | $\tau_1$ (ms) | $\tau_2$ (ms) | $\tau_3$ (ms) | $\langle\tau_{\text{avg.}}\rangle$ (ms) |
|------------------------------|-----------------------------------|---------------|---------------|---------------|-----------------------------------------|
| 340                          | 560                               | 0.31 (8 %)    | 1.36 (52 %)   | 3.0 (52 %)    | 2.29                                    |

## 5. Supporting Characterization Original Data

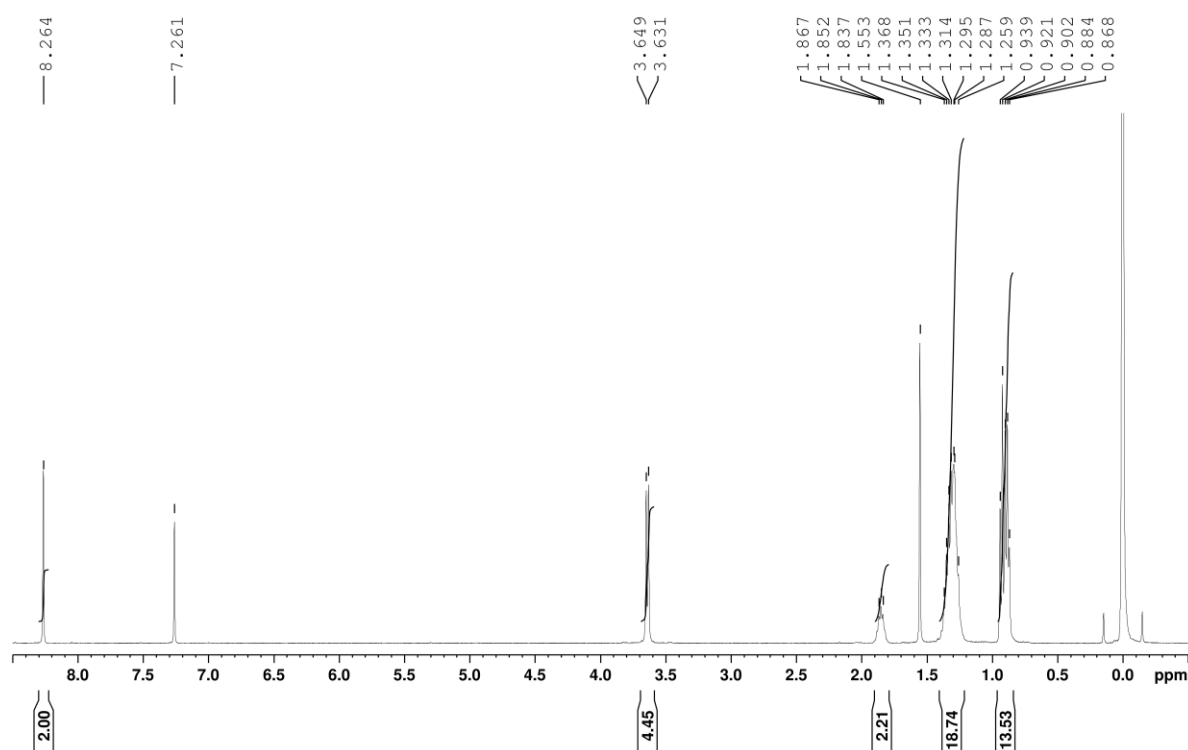

**Figure S26.** <sup>1</sup>H NMR spectrum of **PmDI** in CDCl<sub>3</sub>.

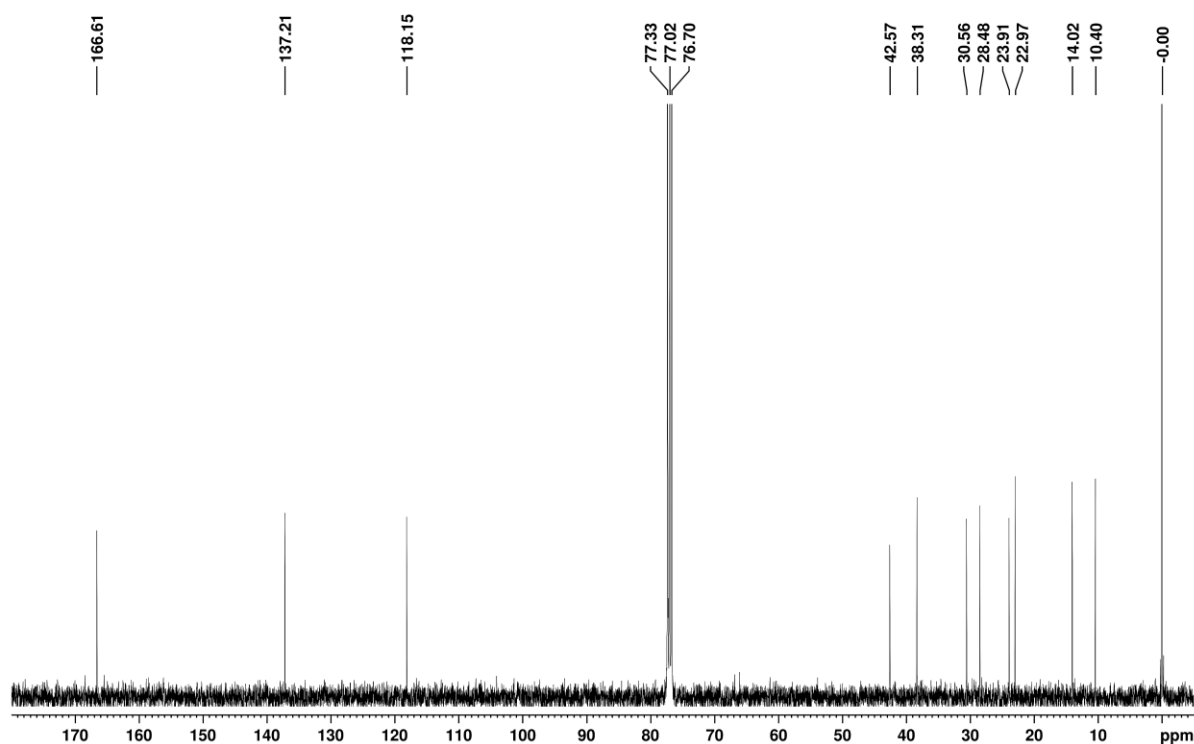

**Figure S27.** <sup>13</sup>C NMR spectrum of **PmDI** in CDCl<sub>3</sub>.

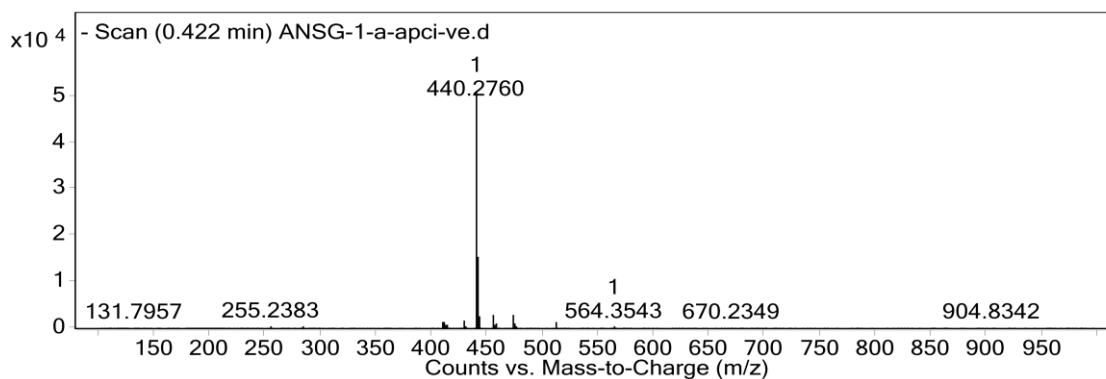

**Figure S28.** APCI-HR-MS spectrum of **PmDI**.

## checkCIF/PLATON report

Structure factors have been supplied for datablock(s) shelx

THIS REPORT IS FOR GUIDANCE ONLY. IF USED AS PART OF A REVIEW PROCEDURE FOR PUBLICATION, IT SHOULD NOT REPLACE THE EXPERTISE OF AN EXPERIENCED CRYSTALLOGRAPHIC REFEREE.

No syntax errors found.      CIF dictionary      Interpreting this report

## Datablock: shelx

|                                                               |                                 |                                                               |
|---------------------------------------------------------------|---------------------------------|---------------------------------------------------------------|
| Bond precision:                                               | C-C = 0.0344 Å                  | Wavelength=0.71073                                            |
| Cell:                                                         | a=5.4537 (5)<br>alpha=90        | b=38.527 (4)<br>beta=93.702 (4)<br>c=15.1042 (15)<br>gamma=90 |
| Temperature:                                                  | 300 K                           |                                                               |
| Volume                                                        | Calculated<br>3167.0 (5)        | Reported<br>3167.0 (5)                                        |
| Space group                                                   | P 21/m                          | P 21/m                                                        |
| Hall group                                                    | -P 2yb                          | -P 2yb                                                        |
| Moiety formula                                                | C26 H36 N2 O4, 0.5 (C10 H12 I2) | ?                                                             |
| Sum formula                                                   | C31 H42 I N2 O4                 | C3.35 H4.54 I0.11 N0.22 O0.16                                 |
| Mr                                                            | 633.57                          | 64.17                                                         |
| Dx, g cm <sup>-3</sup>                                        | 1.329                           | 1.245                                                         |
| Z                                                             | 4                               | 37                                                            |
| Mu (mm <sup>-1</sup> )                                        | 1.046                           | 1.036                                                         |
| F000                                                          | 1308.0                          | 1228.0                                                        |
| F000'                                                         | 1306.59                         |                                                               |
| h, k, lmax                                                    | 6, 45, 17                       | 6, 45, 17                                                     |
| Nref                                                          | 5692                            | 5689                                                          |
| Tmin, Tmax                                                    | 0.847, 0.950                    | 0.518, 0.746                                                  |
| Tmin'                                                         | 0.847                           |                                                               |
| Correction method= # Reported T Limits: Tmin=0.518 Tmax=0.746 |                                 |                                                               |
| AbsCorr = MULTI-SCAN                                          |                                 |                                                               |
| Data completeness=                                            | 0.999                           | Theta(max)= 24.999                                            |

R(reflections)= 0.1088( 3830)

wR2(reflections)=  
0.2799( 5689)

S = 1.141

Npar= 319

The following ALERTS were generated. Each ALERT has the format

**test-name\_ALERT\_alert-type\_alert-level.**

Click on the hyperlinks for more details of the test.

---

#### Alert level A

SHFSU01\_ALERT\_2\_A The absolute value of parameter shift to su ratio > 0.20

Absolute value of the parameter shift to su ratio given 2.659

Additional refinement cycles may be required.

|                   |                                                |       |       |
|-------------------|------------------------------------------------|-------|-------|
| PLAT080_ALERT_2_A | Maximum Shift/Error .....                      | 2.66  | Why ? |
| PLAT241_ALERT_2_A | High 'MainMol' Ueq as Compared to Neighbors of | C18   | Check |
| PLAT241_ALERT_2_A | High 'MainMol' Ueq as Compared to Neighbors of | C32   | Check |
| PLAT242_ALERT_2_A | Low 'MainMol' Ueq as Compared to Neighbors of  | C14   | Check |
| PLAT242_ALERT_2_A | Low 'MainMol' Ueq as Compared to Neighbors of  | C31   | Check |
| PLAT413_ALERT_2_A | Short Inter XH3 .. XHn H33B ..H33B .           | 1.67  | Ang.  |
|                   | -2-x,1-y,2-z =                                 | 3_367 | Check |

---

#### Alert level B

|                   |                                                  |         |        |
|-------------------|--------------------------------------------------|---------|--------|
| PLAT043_ALERT_1_B | Calculated and Reported Mol. Weight Differ by .. | 39.99   | Check  |
| PLAT213_ALERT_2_B | Atom C32 has ADP max/min Ratio .....             | 4.5     | prolat |
| PLAT213_ALERT_2_B | Atom C33 has ADP max/min Ratio .....             | 4.6     | prolat |
| PLAT220_ALERT_2_B | NonSolvent Resd 1 C Ueq(max)/Ueq(min) Range      | 10.0    | Ratio  |
| PLAT220_ALERT_2_B | NonSolvent Resd 2 C Ueq(max)/Ueq(min) Range      | 10.0    | Ratio  |
| PLAT242_ALERT_2_B | Low 'MainMol' Ueq as Compared to Neighbors of    | C17     | Check  |
| PLAT242_ALERT_2_B | Low 'MainMol' Ueq as Compared to Neighbors of    | C27     | Check  |
| PLAT242_ALERT_2_B | Low 'MainMol' Ueq as Compared to Neighbors of    | C30     | Check  |
| PLAT342_ALERT_3_B | Low Bond Precision on C-C Bonds .....            | 0.03443 | Ang.   |
| PLAT412_ALERT_2_B | Short Intra XH3 .. XHn H17A ..H19A .             | 1.79    | Ang.   |
|                   | x,y,z =                                          | 1_555   | Check  |
| PLAT412_ALERT_2_B | Short Intra XH3 .. XHn H31B ..H33B .             | 1.76    | Ang.   |
|                   | x,y,z =                                          | 1_555   | Check  |

---

#### Alert level C

ABSMU01\_ALERT\_1\_C The ratio of given/expected absorption coefficient lies outside the range 0.99 <> 1.01

Calculated value of mu = 1.053

Value of mu given = 1.036

RINTA01\_ALERT\_3\_C The value of Rint is greater than 0.12

Rint given 0.136

|                   |                                                  |       |              |
|-------------------|--------------------------------------------------|-------|--------------|
| PLAT020_ALERT_3_C | The Value of Rint is Greater Than 0.12 .....     | 0.136 | Report       |
| PLAT041_ALERT_1_C | Calc. and Reported SumFormula Strings Differ     |       | Please Check |
| PLAT068_ALERT_1_C | Reported F000 Differs from Calcd (or Missing)... |       | Please Check |
| PLAT082_ALERT_2_C | High R1 Value .....                              | 0.11  | Report       |
| PLAT084_ALERT_3_C | High wR2 Value (i.e. > 0.25) .....               | 0.28  | Report       |
| PLAT213_ALERT_2_C | Atom C28 has ADP max/min Ratio .....             | 3.3   | prolat       |
| PLAT218_ALERT_3_C | Constrained U(ij) Components(s) for C13          | 6     | Check        |
| PLAT218_ALERT_3_C | Constrained U(ij) Components(s) for C16          | 6     | Check        |
| PLAT218_ALERT_3_C | Constrained U(ij) Components(s) for C14          | 6     | Check        |
| PLAT218_ALERT_3_C | Constrained U(ij) Components(s) for C30          | 6     | Check        |

PLAT218\_ALERT\_3\_C Constrained U(ij) Components(s) for C31 . 6 Check  
 PLAT218\_ALERT\_3\_C Constrained U(ij) Components(s) for C17 . 6 Check  
 PLAT222\_ALERT\_3\_C NonSolvent Resd 1 H Uiso(max)/Uiso(min) Range 10.0 Ratio  
 PLAT222\_ALERT\_3\_C NonSolvent Resd 2 H Uiso(max)/Uiso(min) Range 10.0 Ratio  
 PLAT230\_ALERT\_2\_C Hirshfeld Test Diff for C28 --C29 . 6.6 s.u.  
 PLAT234\_ALERT\_4\_C Large Hirshfeld Difference C8 --C10 . 0.17 Ang.  
 PLAT234\_ALERT\_4\_C Large Hirshfeld Difference N2 --C26 . 0.20 Ang.  
 PLAT234\_ALERT\_4\_C Large Hirshfeld Difference C20 --C24 . 0.16 Ang.  
 PLAT242\_ALERT\_2\_C Low 'MainMol' Ueq as Compared to Neighbors of C12 Check  
 PLAT242\_ALERT\_2\_C Low 'MainMol' Ueq as Compared to Neighbors of C13 Check  
 PLAT242\_ALERT\_2\_C Low 'MainMol' Ueq as Compared to Neighbors of C28 Check  
 PLAT250\_ALERT\_2\_C Large U3/U1 Ratio for Average U(i,j) Tensor .... 3.0 Note  
 PLAT250\_ALERT\_2\_C Large U3/U1 Ratio for Average U(i,j) Tensor .... 2.7 Note  
 PLAT260\_ALERT\_2\_C Large Average Ueq of Residue Including O1 0.242 Check  
 PLAT260\_ALERT\_2\_C Large Average Ueq of Residue Including O3 0.279 Check  
 PLAT361\_ALERT\_2\_C Long C(sp3)-C(sp3) Bond C27 - C28 . 1.65 Ang.  
 PLAT411\_ALERT\_2\_C Short Inter H...H Contact H18B ..H32A . 2.06 Ang.  
 1+x,y,z = 1\_655 Check  
 PLAT412\_ALERT\_2\_C Short Intra XH3 .. XHn H3A ..H5B . 1.89 Ang.  
 x,y,z = 1\_555 Check  
 PLAT413\_ALERT\_2\_C Short Inter XH3 .. XHn H19C ..H19C . 2.03 Ang.  
 -1-x,1-y,1-z = 3\_466 Check  
 PLAT906\_ALERT\_3\_C Large K Value in the Analysis of Variance ..... 20.196 Check  
 PLAT906\_ALERT\_3\_C Large K Value in the Analysis of Variance ..... 3.897 Check  
 PLAT906\_ALERT\_3\_C Large K Value in the Analysis of Variance ..... 2.103 Check  
 PLAT972\_ALERT\_2\_C Check Calcd Resid. Dens. 1.12Ang From C20 -2.29 eA-3

### Alert level G

FORMU01\_ALERT\_2\_G There is a discrepancy between the atom counts in the  
 \_chemical\_formula\_sum and the formula from the \_atom\_site\* data.  
 Atom count from \_chemical\_formula\_sum: C3.35 H4.54 I0.11 N0.22 O0.16  
 Atom count from the \_atom\_site data: C3.351351 H4.540540 I0.108108 N0  
 CELLZ01\_ALERT\_1\_G Difference between formula and atom\_site contents detected.  
 CELLZ01\_ALERT\_1\_G ALERT: Large difference may be due to a  
 symmetry error - see SYMMG tests  
 From the CIF: \_cell\_formula\_units\_Z 37  
 From the CIF: \_chemical\_formula\_sum C3.35 H4.54 I0.11 N0.22 O0.16  
 TEST: Compare cell contents of formula and atom\_site data

| atom | Z*formula | cif sites | diff   |
|------|-----------|-----------|--------|
| C    | 123.95    | 124.00    | -0.05  |
| H    | 167.98    | 168.00    | -0.02  |
| I    | 4.07      | 4.00      | 0.07   |
| N    | 8.14      | 8.00      | 0.14   |
| O    | 5.92      | 16.00     | -10.08 |

PLAT002\_ALERT\_2\_G Number of Distance or Angle Restraints on AtSite 14 Note  
 PLAT003\_ALERT\_2\_G Number of Uiso or Uij Restrained non-H Atoms ... 10 Report  
 PLAT045\_ALERT\_1\_G Calculated and Reported Z Differ by a Factor ... 0.108 Check  
 PLAT083\_ALERT\_2\_G SHELXL Second Parameter in WGHT Unusually Large 31.85 Why ?  
 PLAT172\_ALERT\_4\_G The CIF-Embedded .res File Contains DFIX Records 15 Report  
 PLAT177\_ALERT\_4\_G The CIF-Embedded .res File Contains DELU Records 6 Report  
 PLAT178\_ALERT\_4\_G The CIF-Embedded .res File Contains SIMU Records 6 Report  
 PLAT343\_ALERT\_2\_G Unusual sp3 Angle Range in Main Residue for C14 Check  
 PLAT431\_ALERT\_2\_G Short Inter HL..A Contact I001 ..O1 . 3.16 Ang.  
 x,y,z = 1\_555 Check  
 PLAT432\_ALERT\_2\_G Short Inter X...Y Contact O2 ..C21 . 2.93 Ang.

|                                                                    |               |                 |                          |
|--------------------------------------------------------------------|---------------|-----------------|--------------------------|
| PLAT432_ALERT_2_G Short Inter X...Y Contact                        | O3            | x,y,z =<br>..C6 | 1_555 Check<br>2.91 Ang. |
| PLAT720_ALERT_4_G Number of Unusual/Non-Standard Labels            | .....         | -1+x,y,z =      | 1_455 Check              |
| PLAT767_ALERT_4_G INS Embedded LIST 6 Instruction Should be LIST 4 |               |                 | 1 Note                   |
| PLAT790_ALERT_4_G Centre of Gravity not Within Unit Cell: Resd. #  |               |                 | Please Check             |
|                                                                    | C26 H36 N2 O4 |                 | 2 Note                   |
| PLAT793_ALERT_4_G Model has Chirality at C13                       | (Centro SPGR) |                 | S Verify                 |
| PLAT793_ALERT_4_G Model has Chirality at C27                       | (Centro SPGR) |                 | R Verify                 |
| PLAT860_ALERT_3_G Number of Least-Squares Restraints               | .....         |                 | 51 Note                  |
| PLAT883_ALERT_1_G No Info/Value for _atom_sites_solution_primary   |               |                 | Please Do !              |
| PLAT910_ALERT_3_G Missing # of FCF Reflection(s) Below Theta(Min). |               |                 | 4 Note                   |
| PLAT965_ALERT_2_G The SHELXL WEIGHT Optimisation has not Converged |               |                 | Please Check             |
| PLAT967_ALERT_5_G Note: Two-Theta Cutoff Value in Embedded .res .. |               |                 | 50.0 Degree              |
| PLAT978_ALERT_2_G Number C-C Bonds with Positive Residual Density. |               |                 | 0 Info                   |

- 
- 7 **ALERT level A** = Most likely a serious problem - resolve or explain  
11 **ALERT level B** = A potentially serious problem, consider carefully  
35 **ALERT level C** = Check. Ensure it is not caused by an omission or oversight  
25 **ALERT level G** = General information/check it is not something unexpected
- 8 ALERT type 1 CIF construction/syntax error, inconsistent or missing data  
41 ALERT type 2 Indicator that the structure model may be wrong or deficient  
17 ALERT type 3 Indicator that the structure quality may be low  
11 ALERT type 4 Improvement, methodology, query or suggestion  
1 ALERT type 5 Informative message, check
- 

It is advisable to attempt to resolve as many as possible of the alerts in all categories. Often the minor alerts point to easily fixed oversights, errors and omissions in your CIF or refinement strategy, so attention to these fine details can be worthwhile. In order to resolve some of the more serious problems it may be necessary to carry out additional measurements or structure refinements. However, the purpose of your study may justify the reported deviations and the more serious of these should normally be commented upon in the discussion or experimental section of a paper or in the "special\_details" fields of the CIF. checkCIF was carefully designed to identify outliers and unusual parameters, but every test has its limitations and alerts that are not important in a particular case may appear. Conversely, the absence of alerts does not guarantee there are no aspects of the results needing attention. It is up to the individual to critically assess their own results and, if necessary, seek expert advice.

### Publication of your CIF in IUCr journals

A basic structural check has been run on your CIF. These basic checks will be run on all CIFs submitted for publication in IUCr journals (*Acta Crystallographica*, *Journal of Applied Crystallography*, *Journal of Synchrotron Radiation*); however, if you intend to submit to *Acta Crystallographica Section C* or *E* or *IUCrData*, you should make sure that **full publication checks** are run on the final version of your CIF prior to submission.

### Publication of your CIF in other journals

Please refer to the *Notes for Authors* of the relevant journal for any special instructions relating to CIF submission.

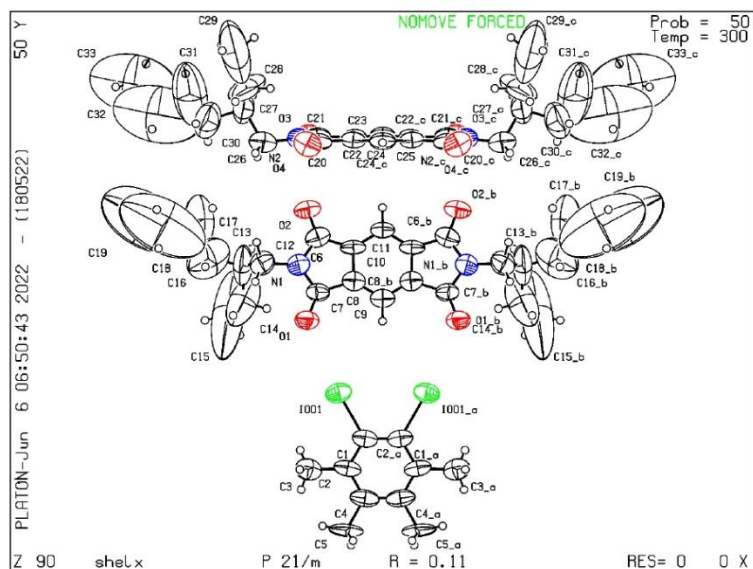

**Figure S29.** Check CIF documents for **A+D<sub>2</sub>** co-crystal.

## checkCIF/PLATON report

Structure factors have been supplied for datablock(s) shelx

THIS REPORT IS FOR GUIDANCE ONLY. IF USED AS PART OF A REVIEW PROCEDURE FOR PUBLICATION, IT SHOULD NOT REPLACE THE EXPERTISE OF AN EXPERIENCED CRYSTALLOGRAPHIC REFEREE.

No syntax errors found.      CIF dictionary      Interpreting this report

### Datablock: shelx

---

Bond precision:      C-C = 0.0300 Å      Wavelength=0.71073

Cell:                      a=5.6900(4)                      b=8.3410(6)                      c=17.5111(12)  
                                alpha=79.981(3)                      beta=82.483(2)                      gamma=89.991(2)  
Temperature:              299 K

|                        | Calculated                | Reported                       |
|------------------------|---------------------------|--------------------------------|
| Volume                 | 811.16(10)                | 811.16(10)                     |
| Space group            | P 1                       | P 1                            |
| Hall group             | P 1                       | P 1                            |
| Moiety formula         | C26 H36 N2 O4, C6 H4 Br I | ?                              |
| Sum formula            | C32 H40 Br I N2 O4        | C4 H5 Br0.12 I0.12 N0.25 O0.50 |
| Mr                     | 723.46                    | 90.43                          |
| Dx, g cm <sup>-3</sup> | 1.481                     | 1.481                          |
| Z                      | 1                         | 8                              |
| Mu (mm <sup>-1</sup> ) | 2.255                     | 2.255                          |
| F000                   | 366.0                     | 366.0                          |
| F000'                  | 365.37                    |                                |
| h,k,lmax               | 6,9,20                    | 6,9,20                         |
| Nref                   | 5690[ 2845]               | 5650                           |
| Tmin,Tmax              | 0.805,0.854               | 0.518,0.746                    |
| Tmin'                  | 0.595                     |                                |

Correction method= # Reported T Limits: Tmin=0.518 Tmax=0.746  
AbsCorr = MULTI-SCAN

Data completeness= 1.99/0.99      Theta(max)= 24.995

|                               |                                 |
|-------------------------------|---------------------------------|
| R(reflections)= 0.0510( 4582) | wR2(reflections)= 0.1570( 5650) |
| S = 1.014                     | Npar= 344                       |

The following ALERTS were generated. Each ALERT has the format

**test-name\_ALERT\_alert-type\_alert-level.**

Click on the hyperlinks for more details of the test.

---

**Alert level A**

SHFSU01\_ALERT\_2\_A The absolute value of parameter shift to su ratio > 0.20  
Absolute value of the parameter shift to su ratio given 0.429  
Additional refinement cycles may be required.  
PLAT080\_ALERT\_2\_A Maximum Shift/Error ..... 0.43 Why ?

---

**Alert level B**

PLAT035\_ALERT\_1\_B \_chemical\_absolute\_configuration Info Not Given Please Do !  
PLAT220\_ALERT\_2\_B NonSolvent Resd 1 C Ueq(max)/Ueq(min) Range 6.7 Ratio  
PLAT234\_ALERT\_4\_B Large Hirshfeld Difference C24 --C25 . 0.28 Ang.  
PLAT241\_ALERT\_2\_B High 'MainMol' Ueq as Compared to Neighbors of C5 Check  
PLAT242\_ALERT\_2\_B Low 'MainMol' Ueq as Compared to Neighbors of C4 Check  
PLAT242\_ALERT\_2\_B Low 'MainMol' Ueq as Compared to Neighbors of C25 Check  
PLAT334\_ALERT\_2\_B Small <C-C> Benzene Dist. C27 -C32 . 1.34 Ang.  
PLAT342\_ALERT\_3\_B Low Bond Precision on C-C Bonds ..... 0.03004 Ang.  
PLAT410\_ALERT\_2\_B Short Intra H...H Contact H8B ..H9B . 1.87 Ang.  
x,y,z = 1\_555 Check  
PLAT926\_ALERT\_1\_B Reported and Calculated R1 Differ by ..... 0.0059 Check  
PLAT927\_ALERT\_1\_B Reported and Calculated wR2 Differ by ..... 0.0138 Check

---

**Alert level C**

ABSMU01\_ALERT\_1\_C The ratio of given/expected absorption coefficient lies  
outside the range 0.99 <> 1.01  
Calculated value of mu = 2.168  
Value of mu given = 2.255  
CHEMW01\_ALERT\_1\_C The ratio of given/expected molecular weight as calculated  
from the \_chemical\_formula\_sum lies outside  
the range 0.99 <> 1.01  
Calculated formula weight = 89.4019  
Formula weight given = 90.4300  
CHEMW01\_ALERT\_1\_C The difference between the given and expected weight for  
compound is greater 1 mass unit. Check that all hydrogen  
atoms have been taken into account.  
STRVA01\_ALERT\_4\_C Flack test results are ambiguous.  
From the CIF: \_refine\_ls\_abs\_structure\_Flack 0.502  
From the CIF: \_refine\_ls\_abs\_structure\_Flack\_su 0.004  
PLAT041\_ALERT\_1\_C Calc. and Reported SumFormula Strings Differ Please Check  
PLAT213\_ALERT\_2\_C Atom C3 has ADP max/min Ratio ..... 3.3 oblate  
PLAT213\_ALERT\_2\_C Atom C5 has ADP max/min Ratio ..... 3.4 prolat  
PLAT213\_ALERT\_2\_C Atom C23 has ADP max/min Ratio ..... 3.1 prolat  
PLAT222\_ALERT\_3\_C NonSolvent Resd 1 H Uiso(max)/Uiso(min) Range 6.7 Ratio  
PLAT234\_ALERT\_4\_C Large Hirshfeld Difference O2 --C1 . 0.18 Ang.  
PLAT234\_ALERT\_4\_C Large Hirshfeld Difference N1 --C1 . 0.16 Ang.  
PLAT234\_ALERT\_4\_C Large Hirshfeld Difference N2 --C15 . 0.17 Ang.  
PLAT234\_ALERT\_4\_C Large Hirshfeld Difference C1 --C11 . 0.21 Ang.  
PLAT234\_ALERT\_4\_C Large Hirshfeld Difference C11 --C12 . 0.18 Ang.  
PLAT234\_ALERT\_4\_C Large Hirshfeld Difference C13 --C14 . 0.17 Ang.  
PLAT234\_ALERT\_4\_C Large Hirshfeld Difference C16 --C17 . 0.17 Ang.

```

PLAT234_ALERT_4_C Large Hirshfeld Difference C19 --C20 . 0.22 Ang.
PLAT234_ALERT_4_C Large Hirshfeld Difference I01 --C27 . 0.17 Ang.
PLAT234_ALERT_4_C Large Hirshfeld Difference Br01 --C30 . 0.19 Ang.
PLAT234_ALERT_4_C Large Hirshfeld Difference C28 --C29 . 0.20 Ang.
PLAT234_ALERT_4_C Large Hirshfeld Difference C31 --C32 . 0.24 Ang.
PLAT241_ALERT_2_C High 'MainMol' Ueq as Compared to Neighbors of C3 Check
PLAT241_ALERT_2_C High 'MainMol' Ueq as Compared to Neighbors of C9 Check
PLAT241_ALERT_2_C High 'MainMol' Ueq as Compared to Neighbors of C23 Check
PLAT241_ALERT_2_C High 'MainMol' Ueq as Compared to Neighbors of C24 Check
PLAT242_ALERT_2_C Low 'MainMol' Ueq as Compared to Neighbors of C19 Check
PLAT244_ALERT_4_C Low 'Solvent' Ueq as Compared to Neighbors of C27 Check
PLAT360_ALERT_2_C Short C(sp3)-C(sp3) Bond C8 - C9 . 1.39 Ang.
PLAT360_ALERT_2_C Short C(sp3)-C(sp3) Bond C9 - C10 . 1.42 Ang.
PLAT360_ALERT_2_C Short C(sp3)-C(sp3) Bond C21 - C22 . 1.42 Ang.
PLAT361_ALERT_2_C Long C(sp3)-C(sp3) Bond C5 - C6 . 1.71 Ang.
PLAT369_ALERT_2_C Long C(sp2)-C(sp2) Bond C14 - C15 . 1.56 Ang.
PLAT410_ALERT_2_C Short Intra H...H Contact H23A ..H24A . 1.93 Ang.
x,y,z = 1_555 Check
PLAT918_ALERT_3_C Reflection(s) with I(obs) much Smaller I(calc) . 2 Check
PLAT977_ALERT_2_C Check Negative Difference Density on H20 . -0.31 eA-3
PLAT987_ALERT_1_C The Flack x is >> 0 - Do a BASF/TWIN Refinement Please Check

```

### Alert level G

```

CELLZ01_ALERT_1_G Difference between formula and atom_site contents detected.
CELLZ01_ALERT_1_G ALERT: check formula stoichiometry or atom site occupancies.
      From the CIF: _cell_formula_units_Z      8
      From the CIF: _chemical_formula_sum   C4 H5 Br0.12 I0.12 N0.25 O0.50
      TEST: Compare cell contents of formula and atom_site data

      atom      Z*formula  cif sites diff
      C          32.00      32.00    0.00
      H          40.00      40.00    0.00
      Br         0.96       1.00   -0.04
      I          0.96       1.00   -0.04
      N          2.00       2.00    0.00
      O          4.00       4.00    0.00
PLAT002_ALERT_2_G Number of Distance or Angle Restraints on AtSite      14 Note
PLAT003_ALERT_2_G Number of Uiso or Uij Restrained non-H Atoms ...      12 Report
PLAT033_ALERT_4_G Flack x Value Deviates > 3.0 * sigma from Zero .      0.502 Note
PLAT045_ALERT_1_G Calculated and Reported Z Differ by a Factor ...      0.125 Check
PLAT111_ALERT_2_G ADDSYM Detects New (Pseudo) Centre of Symmetry .      95 %Fit
PLAT113_ALERT_2_G ADDSYM Suggests Possible Pseudo/New Space Group      P-1 Check
PLAT172_ALERT_4_G The CIF-Embedded .res File Contains DFIX Records      10 Report
PLAT177_ALERT_4_G The CIF-Embedded .res File Contains DELU Records      8 Report
PLAT178_ALERT_4_G The CIF-Embedded .res File Contains SIMU Records      8 Report
PLAT335_ALERT_2_G Check Large C6 Ring C-C Range C11 -C18      0.24 Ang.
PLAT343_ALERT_2_G Unusual sp3 Angle Range in Main Residue for      C8 Check
PLAT343_ALERT_2_G Unusual sp3 Angle Range in Main Residue for      C9 Check
PLAT343_ALERT_2_G Unusual sp3 Angle Range in Main Residue for      C23 Check
PLAT343_ALERT_2_G Unusual sp3 Angle Range in Main Residue for      C24 Check
PLAT720_ALERT_4_G Number of Unusual/Non-Standard Labels .....      5 Note
PLAT767_ALERT_4_G INS Embedded LIST 6 Instruction Should be LIST 4      Please Check
PLAT773_ALERT_2_G Check long C-C Bond in CIF: C5 --C6      1.71 Ang.
PLAT790_ALERT_4_G Centre of Gravity not Within Unit Cell: Resd. #      2 Note
                  C6 H4 Br I
PLAT791_ALERT_4_G Model has Chirality at C4 (Sohnke SpGr)      R Verify

```

```

PLAT791_ALERT_4_G Model has Chirality at C20 (Sohnke SpGr) R Verify
PLAT860_ALERT_3_G Number of Least-Squares Restraints ..... 60 Note
PLAT883_ALERT_1_G No Info/Value for _atom_sites_solution_primary . Please Do !
PLAT909_ALERT_3_G Percentage of I>2sig(I) Data at Theta(Max) Still 51% Note
PLAT910_ALERT_3_G Missing # of FCF Reflection(s) Below Theta(Min). 1 Note
PLAT965_ALERT_2_G The SHELXL WEIGHT Optimisation has not Converged Please Check
PLAT967_ALERT_5_G Note: Two-Theta Cutoff Value in Embedded .res .. 50.0 Degree
PLAT978_ALERT_2_G Number C-C Bonds with Positive Residual Density. 2 Info

```

---

```

2 ALERT level A = Most likely a serious problem - resolve or explain
11 ALERT level B = A potentially serious problem, consider carefully
36 ALERT level C = Check. Ensure it is not caused by an omission or oversight
29 ALERT level G = General information/check it is not something unexpected

12 ALERT type 1 CIF construction/syntax error, inconsistent or missing data
35 ALERT type 2 Indicator that the structure model may be wrong or deficient
6 ALERT type 3 Indicator that the structure quality may be low
24 ALERT type 4 Improvement, methodology, query or suggestion
1 ALERT type 5 Informative message, check

```

---

It is advisable to attempt to resolve as many as possible of the alerts in all categories. Often the minor alerts point to easily fixed oversights, errors and omissions in your CIF or refinement strategy, so attention to these fine details can be worthwhile. In order to resolve some of the more serious problems it may be necessary to carry out additional measurements or structure refinements. However, the purpose of your study may justify the reported deviations and the more serious of these should normally be commented upon in the discussion or experimental section of a paper or in the "special\_details" fields of the CIF. checkCIF was carefully designed to identify outliers and unusual parameters, but every test has its limitations and alerts that are not important in a particular case may appear. Conversely, the absence of alerts does not guarantee there are no aspects of the results needing attention. It is up to the individual to critically assess their own results and, if necessary, seek expert advice.

#### Publication of your CIF in IUCr journals

A basic structural check has been run on your CIF. These basic checks will be run on all CIFs submitted for publication in IUCr journals (*Acta Crystallographica*, *Journal of Applied Crystallography*, *Journal of Synchrotron Radiation*); however, if you intend to submit to *Acta Crystallographica Section C* or *E* or *IUCrData*, you should make sure that **full publication checks** are run on the final version of your CIF prior to submission.

#### Publication of your CIF in other journals

Please refer to the *Notes for Authors* of the relevant journal for any special instructions relating to CIF submission.

---

PLATON version of 18/05/2022; check.def file version of 17/05/2022

Datablock shex - ellipsoid plot

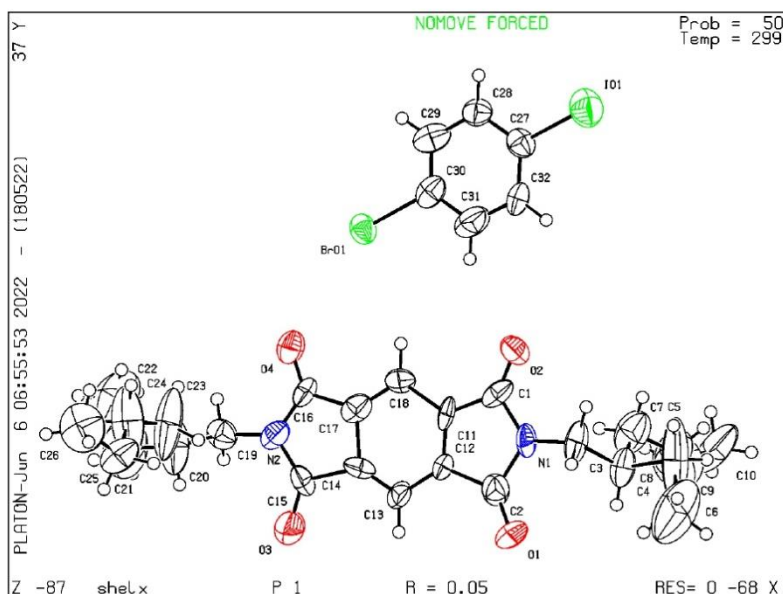

**Figure S30.** Check CIF documents for **A+D<sub>4</sub>** co-crystal.

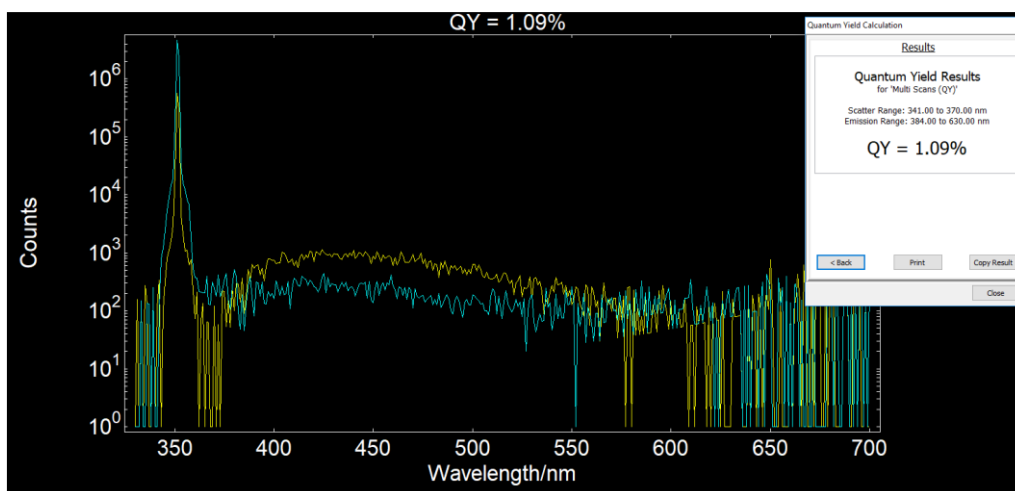

**Figure S31.** Screenshots of phosphorescence quantum yield for **A** crystal.

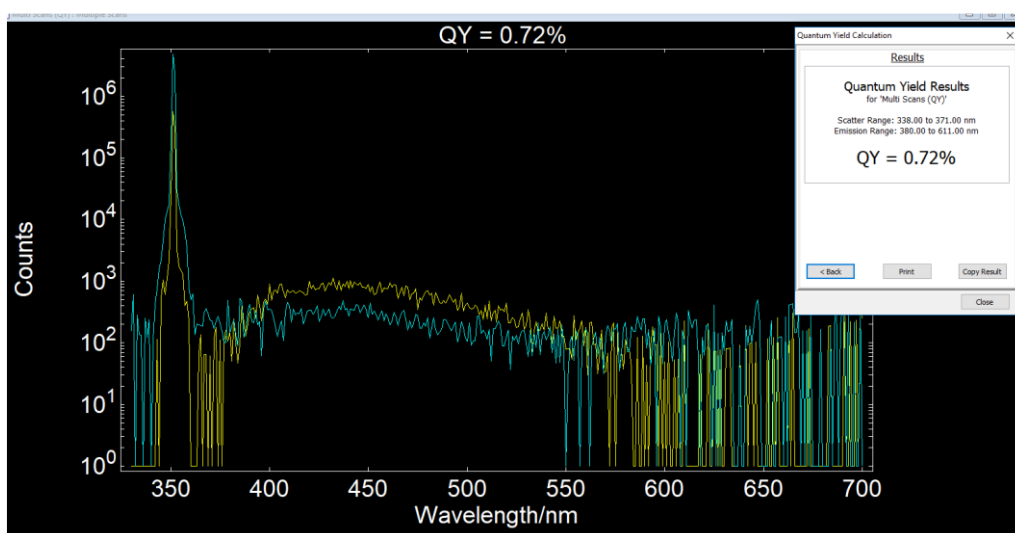

**Figure S32.** Screenshots of phosphorescence quantum yield for **D<sub>1</sub>** crystal.

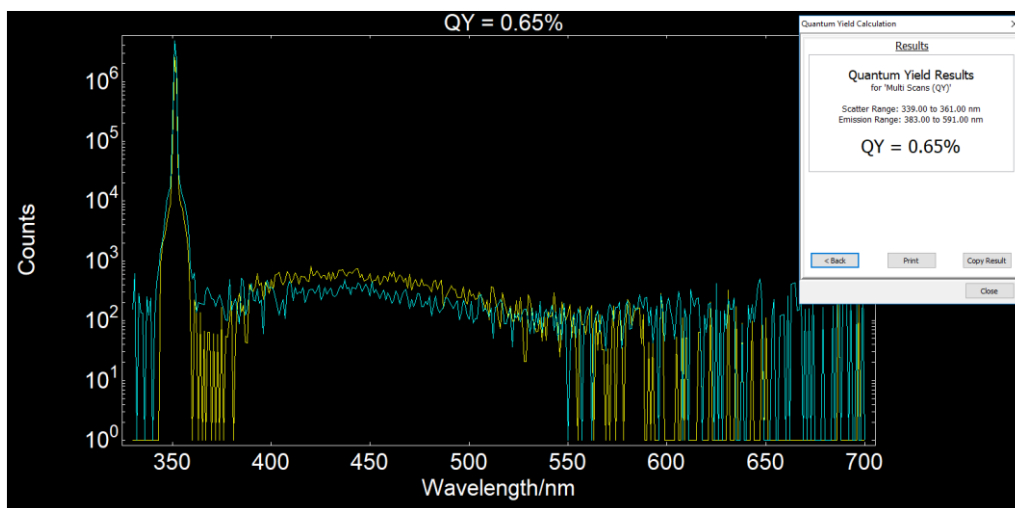

**Figure S33.** Screenshots of phosphorescence quantum yield for **D<sub>2</sub>** crystal.

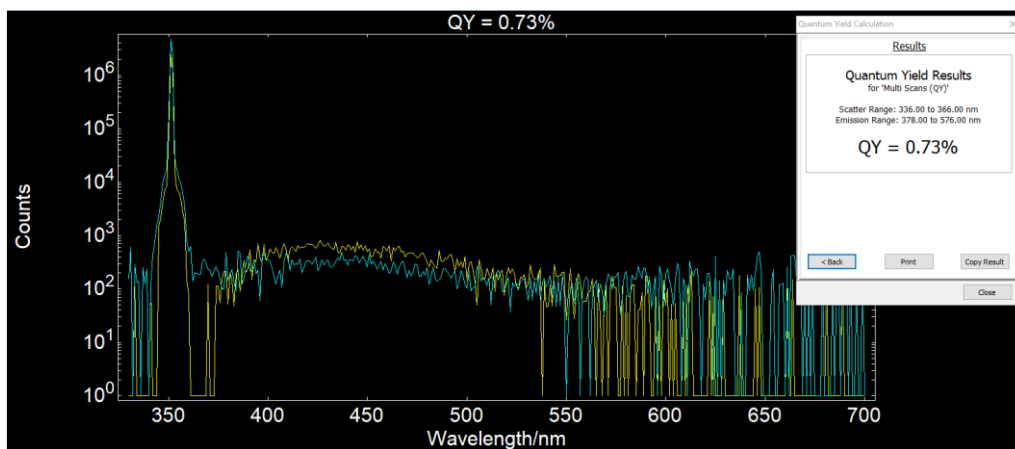

**Figure S34.** Screenshots of phosphorescence quantum yield for  $D_3$  crystal.

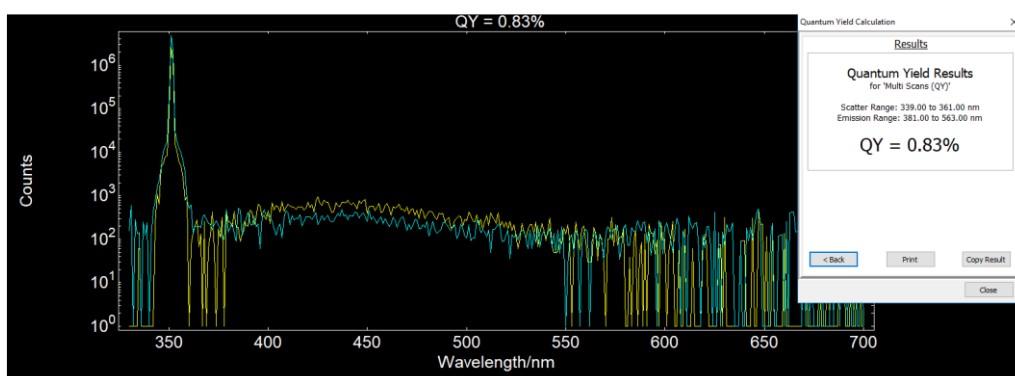

**Figure S35.** Screenshots of phosphorescence quantum yield for  $D_4$  crystal.

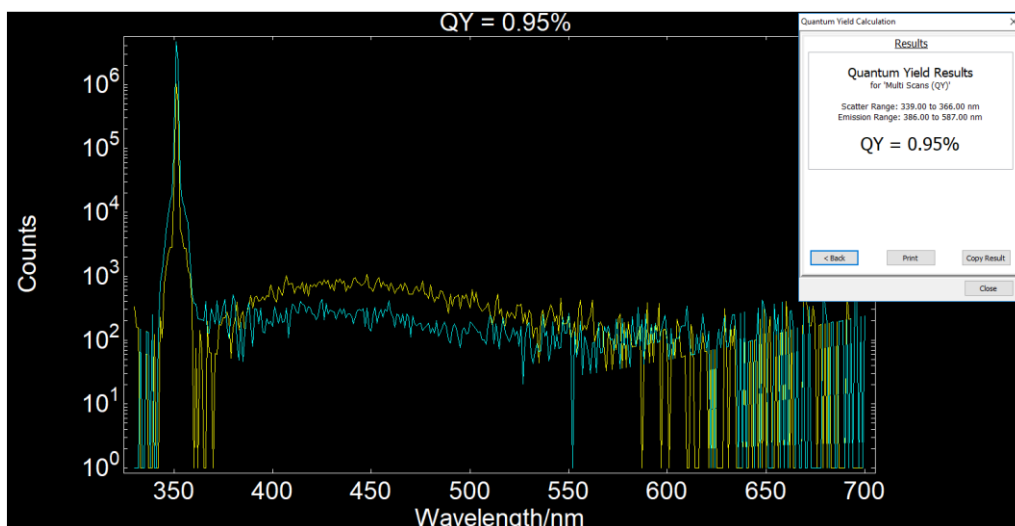

**Figure S36.** Screenshots of phosphorescence quantum yield for  $D_5$  crystal.

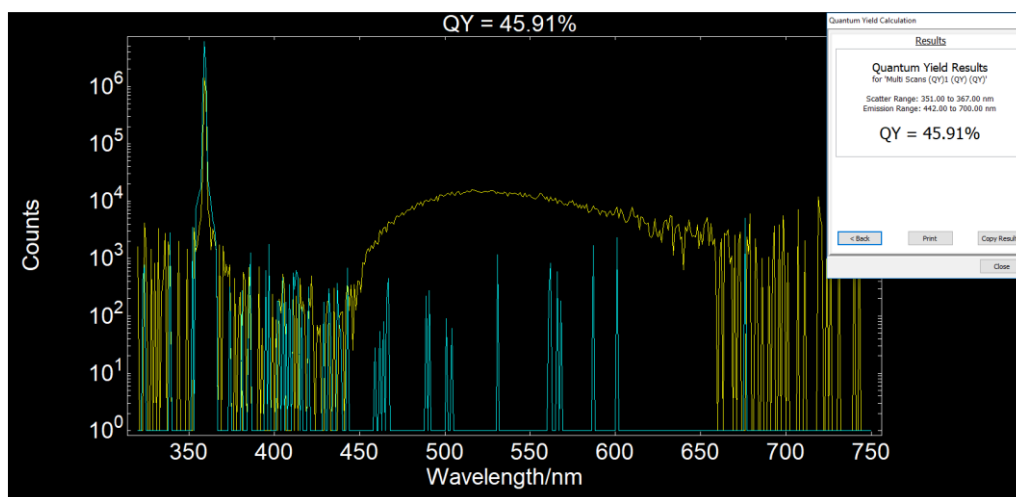

**Figure S37.** Screenshots of phosphorescence quantum yield for **A+D<sub>1</sub>** co-crystal.

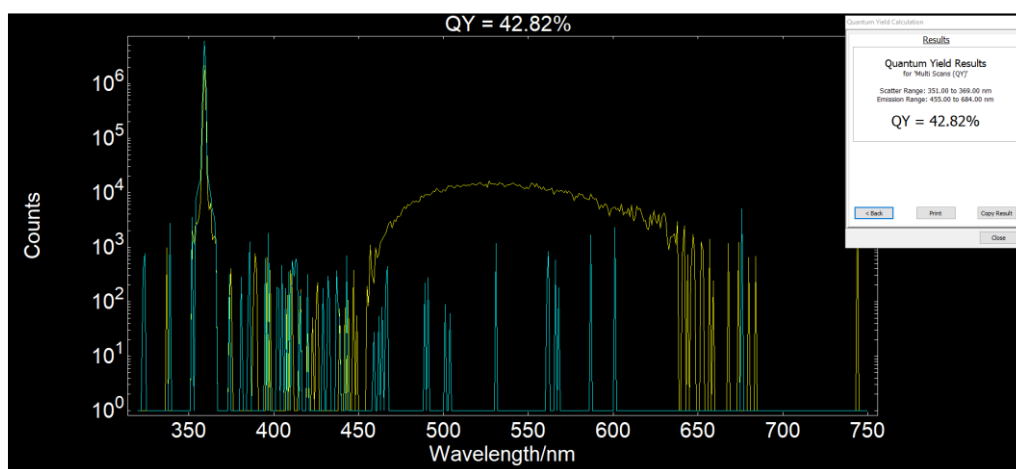

**Figure S38.** Screenshots of phosphorescence quantum yield for **A+D<sub>2</sub>** co-crystal.

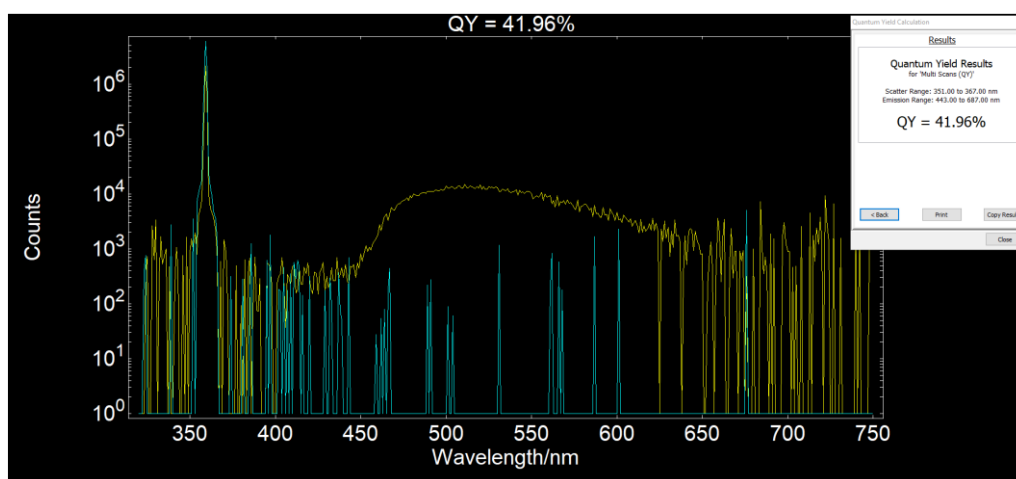

**Figure S39.** Screenshots of phosphorescence quantum yield for **A+D<sub>3</sub>** co-crystal.

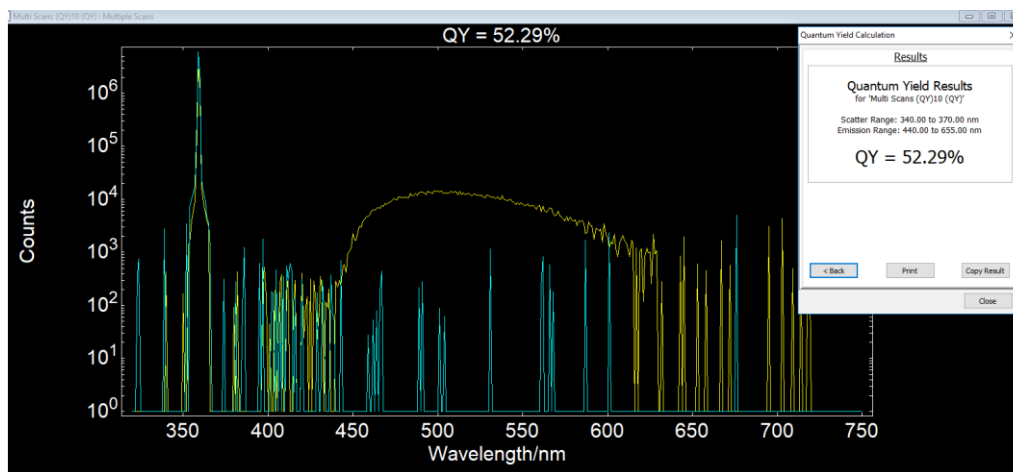

**Figure S40.** Screenshots of phosphorescence quantum yield for **A+D<sub>4</sub>** co-crystal.

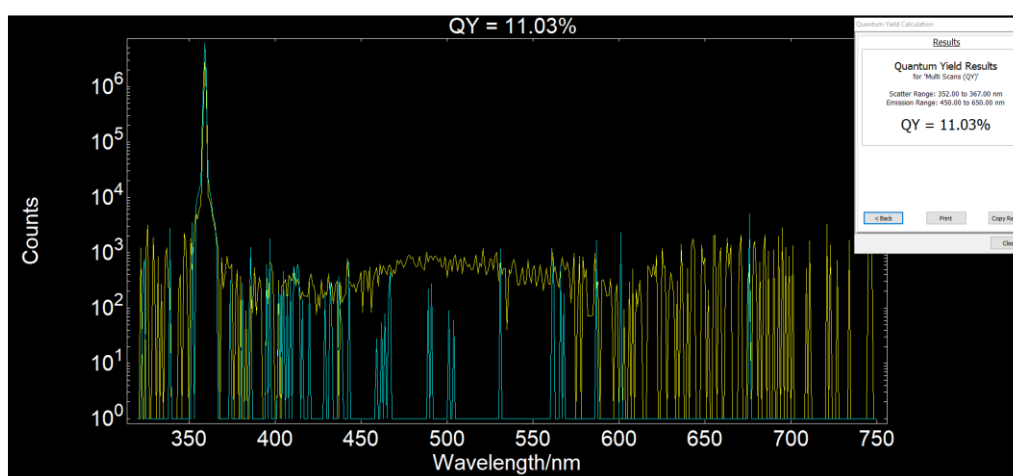

**Figure S41.** Screenshots of phosphorescence quantum yield for **A+D<sub>5</sub>** co-crystal.

## 6. References

[S1] Gaussian 16, Revision C.01, M. J. Frisch, G. W. Trucks, H. B. Schlegel, G. E. Scuseria, M. A. Robb, J. R. Cheeseman, G. Scalmani, V. Barone, G. A. Petersson, H. Nakatsuji, X. Li, M. Caricato, A. V. Marenich, J. Bloino, B. G. Janesko, R. Gomperts, B. Mennucci, H. P. Hratchian, J. V. Ortiz, A. F. Izmaylov, J. L. Sonnenberg, D. Williams-Young, F. Ding, G. Lipparini, F. Egidi, J. Goings, B. Peng, A. Petrone, T. Henderson, D. Ranasinghe, V. G. Zakrzewski, J. Gao, N. Rega, G. Zheng, W. Liang, M. Hada, M. Ehara, K. Toyota, R. Fukuda, J. Hasegawa, M. Ishida, T. Nakajima, Y. Honda, O. Kitao, H. Nakai, T. Vreven, K. Throssell, J. A. Jr. Montgomery, J. E. Peralta, F. Ogliaro, M. J. Bearpark, J. J. Heyd, E. N. Brothers, K. N. Kudin, V. N. Staroverov, T. A. Keith, R. Kobayashi, J. Normand, K. Raghavachari, A. P. Rendell, J. C. Burant, S. S. Iyengar, J. Tomasi, M. Cossi, J. M. Millam, M. Klene, C. Adamo, R. Cammi, J. W. Ochterski, R. L. Martin, K. Morokuma, O. Farkas, J. B. Foresman and D. J. Fox, Gaussian, Inc., Wallingford CT, 2016.

- [S2] A. D. Becke, *J. Chem. Phys.* 1993, **98**, 1372-1377.
- [S3] C. Lee, W. Yang and R. G. Parr. *Phys. Rev. B* 1988, **37**, 785-789.
- [S4] B. Miehlich, A. Savin, H. Stoll and H. Preuss, *Chem. Phys. Lett.* 1989, **157**, 200-206.
- [S5] S. Hirata and M. Head-Gordon, *Chem. Phys. Lett.* 1999, **314**, 291-299.
- [S6] ADF2017, SCM, Theoretical Chemistry, Vrije Universiteit, Amsterdam, The Netherlands, <http://www.scm.com>.
- [S7] D. Cao, M. Hong, A. K. Blackburn, Z. Liu, J. M. Holcroft and J. F. Stoddart, *J. F. Chem. Sci.* 2014, **5**, 4242-4248.
- [S8] S. M. Luo, K. A. Stellmach, S. M. Ikuzwe and D. D. Cao, *J. Org. Chem.* 2019, **84**, 10362-10370.
- [S9] X. Huang, M. Hu, X. Zhao, C. Li, Z. Yuan, X. Liu, C. Cai, Y. Zhang, Y. Hu and Y. Chen, *Org. Lett.* 2019, **21**, 3382-3386.
